1 **Loss of mitochondrial proline catabolism depletes FAD, impairing sperm function, and male**  
2 **reproductive advantage**

3  
4 Chia-An Yen<sup>1,2</sup>, Dana L. Ruter<sup>3</sup>, Nathan Mih<sup>4</sup>, Shanshan Pang<sup>5</sup>, and Sean P. Curran<sup>1,2,5,6\*</sup>

- 5  
6 1. Leonard Davis School of Gerontology, University of Southern California, Los Angeles, CA 90089  
7 2. Department of Molecular and Computation Biology, Dornsife College of Letters, Arts, and  
8 Sciences, University of Southern California, Los Angeles, CA 90089  
9 3. Biology Department, Integrative Program for Biological and Genome Sciences, University of North  
10 Carolina, Chapel Hill, NC 27599  
11 4. Department of Bioinformatics and Systems Biology, University of California San Diego, La Jolla,  
12 CA 92093  
13 5. School of Life Sciences, Chongqing University, Chongqing 401331, China.  
14 6. Norris Comprehensive Cancer Center, Keck School of Medicine, University of Southern  
15 California, Los Angeles, CA 90089

16  
17 Correspondence to: [spcurran@usc.edu](mailto:spcurran@usc.edu)

18  
19  
20 **KEYWORDS**

21 spermatogenesis, mitochondria, germ cells, reproduction, proline catabolism, alh-6/ALDH4A1, C.  
22 elegans, senescence, aging, male-specific

23 **ABSTRACT**

24 Exposure to environmental stress has a clinically established influence on male reproductive health, but  
25 the impact of normal cellular metabolism on sperm quality and function is less well-defined. Here we  
26 show that homeostatic changes in mitochondrial dynamics driven by defective mitochondrial proline  
27 catabolism result in pleiotropic consequences on sperm quality and competitive fitness. Disruption  
28 of *alh-6*, which converts 1-pyrroline-5-carboxylate (P5C) to glutamate, results in P5C accumulation that  
29 drives oxidative stress, activation of SKN-1, and a reduction of energy-storing flavin adenine  
30 dinucleotide (FAD) levels. These molecular changes lead to premature male reproductive senescence  
31 by reducing sperm quality. These sperm-specific defects are suppressed by abating P5C metabolism,  
32 by treatment with antioxidants to combat reactive oxygen species (ROS), or by feeding diets that  
33 restore FAD levels. Our results define a role for mitochondrial proline catabolism and FAD homeostasis  
34 on sperm function and specify strategies to pharmacologically reverse unintended outcomes from SKN-  
35 1/Nrf transcriptional activation.

## 36 **INTRODUCTION**

37 As individuals wait longer to have families, reproductive senescence has become an increasingly  
38 prudent topic (1, 2). Decline in oocyte quality is well-documented with age and can result in fertility issues  
39 when older couples try to conceive (3). Furthermore, pregnancies at an older age pose risks for higher  
40 incidences of birth defects and miscarriages. In humans, female reproduction ceases at menopause at  
41 an average age of 41-60, with the onset of menopause (4). The *C. elegans* "wild type" is hermaphroditic  
42 and self-fertilizing; however, they are capable of making and maintaining Mendelian ratios of male  
43 (sperm-only) animals in their populations. Like humans, *C. elegans* experience a decline in fecundity with  
44 age by halting oocyte production at roughly one-third of their lifespan (5). In addition, regulators of  
45 reproductive aging insulin/IGF-1 and *sma-2*/TGF- $\beta$  signaling are conserved regulators of reproductive  
46 aging from worms to human (6). While the majority of studies in reproductive senescence have focused  
47 on maternal effects, male factors contribute to a large portion of fertility complications with increasing  
48 evidence of an inverse relationship between paternal age and sperm health (2). In fact, studies in  
49 mammals have shown an age-related decline in sperm quality with increased incidences of DNA damage,  
50 reduced motility, abnormal morphology, and decreased semen volume (7-9).

93 Mitochondria are essential for their role in creating energy that fuels all cellular functions; however,  
94 this process generates reactive oxygen species (ROS) as a byproduct. Low levels of ROS have an  
95 important role in cell signaling, hypoxia adaptation, aging, autophagy, immunity, and cell differentiation  
96 (10, 11); while high levels of ROS can be detrimental to cellular function and can lead to cell death.  
97 Multiple studies in humans and mice have implicated different aspects of mitochondrial function in sperm  
98 quality including: mitochondria ultrastructure (12, 13), mitochondrial genome and copy number (14-18),  
99 mitochondria protein levels (19-21), and enzyme activity of ETC complexes (22-24). While all these  
100 studies imply that mitochondrial integrity and activity are important for proper sperm function, the  
101 mechanism behind this relationship is unclear.

102 Mammalian sperm require a low amount of ROS for multiple aspects of sperm function and  
103 successful fertilization of an egg, including: capacitation, hyperactivation, acrosome reaction, and sperm-  
104 oocyte fusion (25-27). Interestingly, many studies have found elevated ROS in sperm to be associated  
105 with lipid peroxidation, DNA damage, reduced motility, and reduced viability in sperm; although the  
106 source of ROS and the mechanism behind ROS-induced sperm defects are unknown (28, 29). Recent  
107 studies show that mitochondria-generated ROS through inhibition of electron transport chain results in  
108 spermatozoa with reduced motility and lipid peroxidation *in vitro* (30, 31). Since the level of ROS in semen  
109 increases with age (7), understanding ROS-mediated sperm defects can provide insight into male  
110 reproductive senescence.

111 Several studies have documented fertility defects in *C. elegans* mitochondrial mutants. Mutation  
112 in *nuo-1*, a complex I component of the mitochondria respiratory chain, results in reduced brood size  
113 caused by impaired germline development (32). Similarly, *clk-1* mutation affects the timing of egg laying,  
114 resulting in reduced brood size (33). Both of these mitochondrial mutations impact fertility, but their role(s)  
115 in spermatogenesis are unclear. *alh-6*, the *C. elegans* ortholog of human *ALDH4A1*, is a nuclear-  
116 encoded mitochondrial enzyme that functions in the second step of the proline metabolism pathway,  
117 converting 1-pyrroline-5-carboxylate (P5C) to glutamate (34). We previously revealed that *alh-6(lax105)*  
118 loss-of-function mutants display altered mitochondrial structure in the muscle accompanied by increased  
119 level of ROS in adult animals (35). Furthermore, mutation in *alh-6* results in the activation of SKN-1/NRF2  
120 (36), an established regulator of oxidative stress response, likely through the accumulation of toxic P5C  
121 disrupting mitochondrial homeostasis (35-39). Interestingly, SKN-1 was recently shown to respond to  
122 accumulation of damaged mitochondria by inducing their biogenesis and degradation through autophagy  
123 (40). Here, we identify a genetic pathway for regulating male reproductive decline stemming from  
124 perturbation of mitochondrial proline metabolism leading to redox imbalance, cofactor depletion, and  
125 altered mitochondria dynamics; all of which play a part in sperm dysfunction.

126

## 127 **RESULTS**

### 128 **Mutation in mitochondrial *alh-6* results in diet-independent reduction in fertility**

129 Altered mitochondrial structure and function have been correlated to loss of proper sperm function  
130 in different species (16, 41-43). In addition, proper sperm function requires a low level of ROS (25-27),  
131 although a specific role for endogenous mitochondrial derived ROS is undefined. ALH-6/ALDH4A1, is a  
132 nuclear-encoded mitochondrial enzyme that functions in the second step of proline catabolism,  
133 converting 1-pyrroline-5-carboxylate (P5C) to glutamate (Figure S1). We anticipated that mutation of *alh-*  
134 *6* may affect the germline, based on our previous assessment of the premature aging phenotypes in  
135 somatic cells in *alh-6* mutants (35). Using an UV-integrated *alh-6::gfp* strain under its endogenous  
136 promoter, we saw that *alh-6* is localized to the mitochondria in the germline of hermaphrodites (Figure  
137 S2). We then assessed progeny output of *alh-6(lax105)* hermaphrodites until egg laying ceased and  
138 found a reduction in self-fertility brood size (-12.9%) (**Figure 1A**). Since the somatic phenotypes of *alh-*  
139 *6(lax105)* mutants are known to be diet-dependent (35, 36), we examined self-fertility of animals fed the  
140 *E. coli* K-12 bacteria HT115, to determine if the reduced reproductive output is also dependent on the  
141 type of bacterial diet ingested. Surprisingly, we found that the self-fertility of *alh-6* animals was markedly  
142 reduced (-20.7%), when animals were fed the K-12 diet (**Figure 1B**). *alh-6* mutants have similar timing  
143 in their progeny output as compared to wild type animals on both diets (Figures S3A-B). Since *alh-6*  
144 mutants display normal development and reproductive timing, the progeny deficit is not a result of an  
145 attenuated reproductive span which reveals the differential impact of *alh-6* loss in the soma (diet-  
146 dependent) (35) and the germline (diet-independent).  
147  
148

### 149 ***alh-6* fertility defects are sperm-specific**

150 We noted that *alh-6* mutant hermaphrodite animals laid twice as many unfertilized oocytes as wild  
151 type animals over their reproductive-span (**Figure 1C**), suggesting a loss of sperm function (44-46). It is  
152 notable that *alh-6* mutant hermaphrodites lay very few, if any, dead eggs (**Figure 1C**), suggesting that  
153 the loss of ALH-6 activity is not lethal. To determine whether the reduced brood size of *alh-6* mutants are  
154 due to a general loss of germ cells or a specific defect in oocytes or sperm, we examined the mated-  
155 fertility of these animals by mating wild type young adult (day 0-1) males to either wildtype or *alh-6* mutant  
156 virgin hermaphrodites (in wild type *C. elegans*, male sperm outcompetes hermaphrodite sperm >99% of  
157 the time (47, 48)). We found that the reduced fertility in *alh-6* mutant hermaphrodites is fully rescued by  
158 wild type sperm, which confirmed that oocyte quality is not impaired but rather, *alh-6* hermaphrodite  
159 sperm is dysfunctional (**Figures. 1D-E**).

160 To better assess the quality of *alh-6* mutant sperm, we measured the ability of *alh-6* mutant sperm  
161 to compete with wild type sperm (49). To differentiate between progeny resulting from mating and  
162 progeny that arise from hermaphrodite self-fertilization, we made use of male animals harboring a GFP  
163 transgene such that any cross-progeny will express GFP while progeny that arise from hermaphrodite  
164 self-sperm will not (**Figure 1D**). We found that wild type hermaphrodites when mated to *alh-6* mutant  
165 males have significantly more self-progeny as compared to wild type hermaphrodites mated to wild type  
166 males (**Figure 1F**). This finding indicates a sperm competition deficit of *alh-6* males resulting in a brood  
167 derived from self-fertilization, which is uncommon after mating has occurred (47). As hermaphrodite *C.*  
168 *elegans* produce a set amount of sperm during L4 stage before switching exclusively to oogenesis,  
169 eventually depleting its reservoir of sperm (47, 50). To assess whether *alh-6* mutant sperm are generally-  
170 dysfunctional, we mated older hermaphrodites that had depleted their complement of self-sperm and  
171 found that *alh-6* mutant males are able to produce equal numbers of progeny as wild type males when  
172 the need for competition with hermaphrodite sperm is abated (Figure S4A); thus, although *alh-6* mutant  
173 sperm are impaired for competition, they remain competent for reproduction. This is similar to recent  
174 study on *comp-1*, a mutation which results in context-dependent competition deficit in *C. elegans* sperm  
175 (51). Similarly, older *alh-6* mutant hermaphrodites mated to young wild type males yield similar level of  
176 progeny as age-matched WT hermaphrodites, which further supports a model where sperm, but not  
177 oocytes, are defective in *alh-6* mutants (Figure S4B).

178 Similar to mammals, the contribution of sperm to fertility in *C. elegans* is dictated by distinct  
179 functional qualities, which include: sperm number, size, and motility (49, 52, 53). In *C. elegans*, male  
180 sperm are larger and faster than hermaphrodite sperm, which affords a competitive advantage (53). We  
181 next sought to define the nature of the sperm competition defect in *alh-6* mutants by measuring sperm  
182 size, motility, and number in *alh-6* mutants compared to wild type animals. One day after spermatogenesis  
183 initiation (at the L4 larval stage of development), *alh-6* adult hermaphrodites have a reduced number of sperm  
184 in the spermatheca as compared to wild type (Figure S5A), which is correlated with the reduced self-fertility  
185 observed (**Figures 1A-B**). In contrast, age-matched *alh-6* mutant males have similar numbers of sperm as  
186 WT males, suggesting that they have a similar rate of production (**Figure 2A**). We next examined sperm size  
187 in day 1 adult males and discovered that *alh-6* mutant spermatids are significantly smaller as compared to  
188 wild type (**Figure 2B**). To achieve motility, *C. elegans* sperm must be activated to allow pseudopod  
189 development, and this development requires protease activation (54) (Figure 5B). *In vitro*, sperm activation  
190 can be recapitulated by treatment of isolated spermatids with Pronase (55). In addition to reduced size, the  
191 percentage of activated spermatozoa was significantly reduced in *alh-6* mutants as compared to wild type  
192 (**Figure 2C**). Taken together, the reduction of sperm quantity and quality (size and activation) are contributors  
193 to the reduced fertility in *alh-6* mutants.

### 194 195 **Transcriptional signatures define temporal phenotypes of *alh-6* activity**

196 We first identified *alh-6* mutant in a screen for activators of the cytoprotective transcription factor  
197 SKN-1/NRF2 using *gst-4p::gfp* as a reporter (35, 36). When activated, SKN-1 transcribes a variety of  
198 gene targets that collectively act to restore cellular homeostasis. However, this can come with an  
199 energetic cost with pleiotropic consequences (35, 36, 56-61). *alh-6* mutants have normal development,  
200 but display progeric phenotypes towards the end of the normal reproductive span (35) indicating a  
201 temporal switch in phenotypic outcomes. We reasoned that the temporally controlled phenotypes in the  
202 *alh-6* mutants could be leveraged to identify potential mechanisms by which *alh-6* loss drives cellular  
203 dysfunction. As SKN-1 is activated in *alh-6* mutants after day 2 of adulthood (35), we defined genes that  
204 display differentially altered expression in the L4 developmental stage, when spermatogenesis occurs,  
205 as compared to Day 3 adults (post SKN-1 activation). We performed RNA-Seq analyses of worms with  
206 loss of *alh-6* and identified 1935 genes in L4 stage animals and 456 genes in Day 3 adult animals that  
207 are differentially expressed ( $\pm$  Log<sub>2</sub> (fold change), 0.05 FDR). Intriguingly, the gene expression changes  
208 at these two life periods had distinct transcriptional signatures (**Figures 3A-B**; Figure S6). Because the  
209 loss of *alh-6* drives compensatory changes in normal cellular metabolism, which later in life results in the  
210 activation of SKN-1, we expected to identify significant changes in both metabolic genes and SKN-1  
211 target genes. Supporting this hypothesis, the gene ontology (GO) terms most enriched include  
212 oxidoreductases and metabolic enzymes in L4 stage animals (**Figure 3A**) and SKN-1-dependent targets  
213 such as glutathione metabolism pathway genes in Day 3 adults (**Figure 3B**). Importantly, our  
214 transcriptomic analysis recapitulated the temporally-dependent phenotypic outcomes resulting from *alh-*  
215 *6* loss; genes in the pseudopodium and germ plasm GO terms class displayed reduced expression in L4  
216 (**Figure 3A**), which could impact *C. elegans* spermatogenesis. In contrast, genes in the muscle-specific  
217 GO term class displayed increased expression in day 3 adults (**Figure 3B**), which is when SKN-1 activity  
218 is enhanced in the muscle of *alh-6* mutants (36). Taken together, the transcriptome analysis of *alh-6*  
219 mutants is diagnostically relevant and informative for defining drivers of organism-level phenotypic  
220 changes in animals with altered proline catabolism.

### 221 222 **FAD mediates sperm functionality and competitive fitness**

223 The strong enrichment of genes whose protein products utilize and/or bind cofactors or co-  
224 enzymes was intriguing as the maintenance of metabolic homeostasis and the redox state of the cell  
225 requires a sophisticated balance of multiple cofactors (**Figure 4A**). In fact, the proline catabolism  
226 pathway utilizes multiple cofactors to generate glutamate from proline; PRDH-1 uses FAD as a co-factor  
227 while ALH-6 utilizes the reduction of NAD<sup>+</sup>. In the absence of ALH-6, PRDH-1 would continue to deplete  
228 FAD, which would activate compensatory pathways to maintain metabolic homeostasis in addition to

229 activating pathways to detoxify P5C (oxidoreductases, P5C reductase, etc.). In light of this hypothesis  
230 we measured FAD and found a significant reduction in *alh-6* mutant animals (**Figure 4B**). As such, we  
231 predicted that restoration of FAD levels might alleviate the sperm-specific phenotypes of *alh-6* mutants.  
232 Dietary supplementation of riboflavin has been shown to increase cellular FAD levels (62, 63), and when  
233 fed to *alh-6* mutants, it restored sperm function. We found that wild type hermaphrodites mated to *alh-6*  
234 mutant males that were fed a diet supplemented with 2.5mM riboflavin produced significantly more total  
235 progeny than *alh-6* males fed the standard OP50 diet (Figure S7). Moreover, riboflavin supplementation  
236 was sufficient to restore male sperm size (**Figure 4C**) and also rescued the impaired activation (**Figure**  
237 **4D**) of male sperm in *alh-6* mutants. Taken together, these data suggest that loss of *alh-6* leads to a  
238 decrease in cellular FAD levels that drives sperm dysfunction.  
239

#### 240 **Loss of cellular proline catabolism is not causal for sperm defects in *alh-6* mutants**

241 We were curious to uncover additional molecular mechanisms that underlie the loss of sperm  
242 function in *alh-6* mutants. To do this, we performed an EMS mutagenesis screen to identify suppressors  
243 of the induced *gst-4p::gfp* expression phenotype in *alh-6* mutants (**Figure 5A**) (35). We identified one  
244 suppressor allele, *lax228*, which we mapped to right arm of chromosome IV between F49E11 and  
245 Y57G11B SNPs. We then generated a list of candidate genes in this region with non-synonymous  
246 mutations in the exons of protein coding genes using whole genome sequencing data of the *alh-6* mutant  
247 compared to the suppressor mutant *alh-6(lax105); lax228* (64). We tested each of these genes by RNA  
248 interference (RNAi) in the *alh-6;gst-4p::gfp* strain to phenocopy the suppressor. RNAi of *B0513.5*,  
249 hereafter referred to as *prdh-1* as it encodes for proline dehydrogenase, was the only RNAi target that  
250 phenocopied the *lax228* mutant (Figures S8A-B). PRDH-1 catalyzes the first enzymatic step of proline  
251 catabolism (**Figure 5B**), converting proline to P5C. Importantly, this enzyme is linked to several of the  
252 phenotypes of *alh-6* mutants including the generation of P5C (9) and the continued reduction of FAD,  
253 documented above (**Figure 4B**). We also examined the expression of the proline catabolism pathway  
254 genes from our RNA-Seq analysis and discovered a significant increase in the expression of enzymes  
255 that would prevent the accumulation of P5C in *alh-6* mutant L4 animals, before irreparable damage  
256 occurs (**Figure 5C**). Specifically, there was an increase in expression of pyrroline-5-carboxylate  
257 reductase (*M153.1/PYCR*) that converts P5C back to proline and ornithine transaminase(*oatr-1/OAT*)  
258 that converts P5C to ornithine. Surprisingly, the expression of pyrroline-5-carboxylate synthase (*alh-*  
259 *13/P5CS*) was also increased, however P5CS has two enzymatic functions: glutamate kinase (GK) and  
260  $\gamma$ -glutamyl phosphate reductase (GPR) activities that impact additional nodes of cellular metabolism.  
261 Moreover, since proline itself has important roles in cellular protection, the increased expression of P5CS  
262 might be an important stress response, but with pleiotropic consequences as it would deplete glutamate  
263 and increase an already accumulating pool of P5C.

264 To determine how the total loss of proline catabolism would affect *C. elegans* reproduction, we  
265 examined the *alh-6; prdh-1* double mutant in our panel of reproduction and sperm quality assays. The  
266 reduction in spermatid size (**Figure 5D**) and impairment of spermatid activation (**Figure 5E**) in *alh-6*  
267 mutants are both suppressed by loss of *prdh-1*. In addition, the *prdh-1* mutation restored the reduced  
268 self-fertility (Figure S9A), lower hermaphrodite sperm count (Figure S9B), and suppressed the increased  
269 laying of unfertilized oocytes of the *alh-6* single mutant (Figure S9A). Finally, the reduced ability of *alh-*  
270 *6* male sperm to compete against wild type hermaphrodite sperm was abrogated in the *alh-6;prdh-1*  
271 double mutant (Figure S9C). These results were surprising as they reveal that loss of flux through the  
272 mitochondrial proline catabolism pathway is benign for animal reproductive fitness, but suggests instead  
273 that P5C accumulation is instrumental in driving sperm dysfunction in *alh-6* animals.  
274

#### 275 **Endogenous ROS drives *alh-6* sperm defects**

276 Several studies have examined the impact of exogenous ROS-inducing electrophiles on sperm  
277 function, but the impact of endogenously produced ROS on sperm function remains poorly defined. The  
278 continuous generation of P5C by PRDH-1 leads to the accumulation of this highly toxic and unstable  
279 biomolecule, which can lead to redox imbalance and impair the normal function of germ cells as it does

280 for somatic tissues (35, 37-39, 65). If the sperm defects in the *alh-6* mutants are a result of a loss of redox  
281 and/or ROS homeostasis, then we anticipated that antioxidants could alleviate these phenotypes. We  
282 supplemented the diet of *alh-6* mutant males with the antioxidant N-acetylcysteine (NAC), from birth  
283 through reproductive maturity, and re-measured the reproductive parameters of these animals. NAC  
284 supplementation restored spermatid size and activation of *alh-6* animals to WT levels (**Figures 5D-E**).  
285 Antioxidant supplementation in wild type (Figures S10A-B) or *alh-6; prdh-1* double mutants had no effect  
286 (Figures S10C-D). Collectively, these data suggest that endogenous production of ROS is causative for  
287 the sperm dysfunction seen in *alh-6* animals. In addition, this study reveals that antioxidant  
288 supplementation can act as a treatment to overcome reproductive deficiencies stemming from defects in  
289 specific cellular metabolic pathways.

### 291 **Mitochondrial dynamics regulate spermatid function**

292 Although there is a clear and documented role for mitophagy in the clearance of paternal  
293 mitochondria post-fertilization in *C. elegans*, the role(s) for mitochondrial dynamics and turnover in sperm  
294 function prior to zygote formation are unclear. We first examined mitochondrial dynamics in wild type  
295 sperm by staining with the fluorescent, mitochondrial-specific dye JC-1 (ThermoFisher), and noted that  
296 each spermatid on average contained multiple discernable spherical mitochondria that are mostly not  
297 fused (**Figures 6A, 6B, 6G**). Previous studies in yeast and cultured mammalian cells have shown that  
298 when cells are exposed to mild stress, the initial response of mitochondria is to fuse in an attempt to  
299 dilute damage (66-68). Indeed *alh-6* mutant spermatids had mitochondria that were more interconnected  
300 (**Figures 6C, 6D, 6G**) as compared to wild type spermatids, which supports our finding that these sperm  
301 are under oxidative stress (**Figure 5**). Loss of *prdh-1*, which restores sperm function (**Figure 5**), returned  
302 spermatid mitochondria to more punctate structures (**Figures 6E, 6F, 6G**). Similarly, treatment with the  
303 antioxidant NAC returned *alh-6* mutant mitochondria in spermatids to wild type levels of fusion (**Figure**  
304 **6H**). The JC-1 dye accumulates in mitochondria in a membrane potential ( $\Delta\Psi$ )-dependent manner, and  
305 as concentration exceeds threshold, its fluorescence switches from green to red emission; thus, a higher  
306 red-to-green fluorescence ratio is indicative of healthier mitochondria, with higher  $\Delta\Psi$ . *alh-6* mutant  
307 spermatids have reduced red:green JC-1 fluorescence that indicates a lower mitochondrial  $\Delta\Psi$ , and an  
308 accumulation of unhealthy mitochondria (**Figure 6I**).

309 The role of mitochondrial dynamics (fusion and fission) in the maturation of sperm has not been  
310 studied; however recent work has revealed that the mitochondrial fusion and fission machinery are  
311 important for the elimination of paternal mitochondria post-fertilization (69). FZO-1 is required for proper  
312 fusion of the mitochondrial membranes and DRP-1 is required for mitochondrial fission (70, 71). The  
313 balance of this fusion and fission machinery in the upkeep of mitochondrial homeostasis allows cells to  
314 respond to changes in metabolic needs and external stress (72, 73). RNAi of *fzo-1* suppressed the  
315 enhanced fusion observed in *alh-6* mutant spermatid mitochondria indicating mitochondrial fusion is  
316 active in spermatids with impaired proline catabolism (**Figure 6J**). We next examined spermatids from  
317 *drp-1* mutant animals and observed a greater level of mitochondrial fusion as compared to wild type and  
318 *alh-6* mutant spermatids (**Figure 6K**). We observed a synergistic level of mitochondrial fusion in  
319 spermatids derived from *alh-6; drp-1* double mutants. This finding is consistent with previous studies in  
320 yeast which reveal that defects in fusion can be compensated for by changes in the rates of fission and  
321 vice versa (72, 73). In support of our model where mitochondrial dynamics act as a major driver of the  
322 sperm-specific defects in *alh-6* mutants, we discovered that loss of *drp-1*, which results in increased  
323 mitochondrial fusion (like that observed in *alh-6* mutants), also reduces sperm activation (**Figure 6L**).  
324 Moreover, reduced *fzo-1* does not alter activation in wild type sperm, but restores activation in *alh-6*  
325 sperm (**Figure 6M**); suggesting increased fusion in *alh-6* sperm mitochondria is impairing proper function.  
326 Taken together, these data support a model where loss of mitochondrial proline catabolism induces  
327 mitochondrial stress, activating mitochondrial fusion, which can subsequently eliminate damage in order  
328 to preserve functional mitochondria (**Figure 6N**). These data also reveal a functional role for  
329 mitochondrial fusion and fission in maintaining proper sperm function. In conclusion, our studies define  
330 mitochondrial proline catabolism as a critical metabolic pathway for male reproductive health.

331

332 **DISCUSSION**

333 Here we investigate the effects of mutation in the mitochondrial enzyme gene *alh-6*, and the  
334 associated increased ROS levels on male fertility stemming from defective mitochondrial proline  
335 catabolism. We found that *alh-6* mutants show a reduction in brood size that is sexually dimorphic;  
336 defects in sperm function but not oocytes contribute to reduced hermaphrodite fertility. As societal factors  
337 continue to push individuals to wait longer to have children, our studies are of critical importance to  
338 elucidate how restoring and maintaining functional amino acid catabolism during aging will promote  
339 reproductive success.

340 Although *C. elegans* is a well-established organism for studying aging and reproduction, with  
341 several studies describing hermaphrodite reproductive senescence, many questions regarding the basis  
342 of male reproductive decline remain unanswered. Decades of work have shown that exposure to  
343 pollution, toxins, xenobiotics, and other ROS-inducing compounds can prematurely drive the loss of  
344 sperm function (29, 74, 75), but the impact that normal cellular metabolism plays on sperm function and  
345 the identification of specific molecules that can mediate sperm quality are not well-defined. In this study  
346 we characterized a new role for mitochondrial proline catabolism and FAD homeostasis in the  
347 maintenance of proper sperm function. Perturbation of this pathway, through mutation of *alh-6/ALDH4A1*,  
348 increases ROS, causing metabolic stress and increased mitochondrial fusion in spermatids, which results  
349 in impaired sperm function and premature reproductive senescence

350 Mutation in proline dehydrogenase (*PRODH*) in humans results in hyperprolinemia type I (HPI),  
351 while mutation in delta-1-pyrroline-5-carboxylate dehydrogenase (*ALDH4A1/P5CDH*) results in  
352 hyperprolinemia type II (HPH). Surprisingly, in *C. elegans*, mutation in upstream proline dehydrogenase  
353 gene, *prdh-1*, is able to suppress all the reproductive defects in *alh-6* mutants suggesting that overall  
354 reduction in proline catabolism is not causal for the observed reproduction phenotypes. In humans, the  
355 diagnosis of HPI and HPH are both through by elevated level of proline in plasma, with addition of high  
356 level of P5C in HPH patients. The symptoms of HPI varies on severity depending on the reduction of  
357 *PRODH* activity (type of mutation) and are characterized by neurological, auditory, and renal defects (53).  
358 Although proline catabolism has not previously been shown to have a direct role in fertility, human fertility  
359 studies have shown that the addition of proline in cryopreservation medium improves sperm mobility and  
360 preservation of membrane integrity upon thawing (60, 61). This study reveals that in *C. elegans*, proline  
361 catabolism impacts several functional qualities of sperm. Loss of proline catabolism results in smaller  
362 sperm with impaired activation, two qualities that directly impact competitive advantage. As such, proline  
363 biosynthesis, catabolism, and steady state concentrations must be tightly regulated, and the importance  
364 of proline in cellular homeostasis may help explain the transcriptional responses measured in animals  
365 with dysfunctional *alh-6* (**Figures 3 and 4**).

366 Our previous work defined the age-dependent decline in function of somatic tissues, particularly  
367 muscle in animals lacking functional ALH-6 (35, 36), which is not manifested until Day 3 of adulthood.  
368 This study reveals that although somatic phenotypes are observed post-developmentally, the germline  
369 and specifically sperm are sensitive to loss of *alh-6* much earlier in development (phenotypes assayed  
370 at L4 or Day 1 of adulthood), with many physiological consequences from dysregulation of metabolism.  
371 Reproductive senescence is a field of growing significance as the number of couples that choose to delay  
372 having children increases. About 30-40% of all male infertility cases are associated with increased levels  
373 of ROS, yet we don't understand the underlying mechanism (76). Additionally, sperm quality has been  
374 shown to decline with age, as ROS content increases with age (7, 8, 77, 78), demonstrating the link  
375 between ROS and male reproductive senescence. Our study demonstrates that perturbation of  
376 mitochondrial proline catabolism, particularly mutation in *alh-6/ALDH4A1*, leads to redox imbalance and  
377 impaired sperm function. Importantly, addition of antioxidants to diet can abrogate this sperm dysfunction  
378 (**Figures 5D-E**), implicating the potential therapeutic effects of antioxidant supplement in male infertility  
379 arising from redox imbalance.

380 Recent studies have focused on the role of NAD<sup>+</sup> metabolism in cellular health, while the impact  
381 of FAD has received less attention. FAD levels are diminished in *alh-6* animals specifically at the L4 stage  
382 when spermatogenesis is occurring (**Figure 4B**). Riboflavin (Vitamin B<sub>2</sub>) is a precursor to FAD and flavin



383 mononucleotide (FMN) cofactors that are needed for metabolic reactions (like proline catabolism and  
384 mitochondrial oxidative phosphorylation) to maintain proper cellular function. Despite its importance,  
385 humans lack a riboflavin biosynthetic pathway and therefore require riboflavin from exogenous sources  
386 (79). Insufficient intake can lead to impairment of flavin homeostasis, which is associated with cancer,  
387 cardiovascular diseases, anemia, neurological disorders, fetal development, etc. (79). Our study  
388 suggests that riboflavin and FAD play critical roles in reproduction as *alh-6* mutants suffer from sperm  
389 dysfunction driven by a reduction in FAD levels (**Figure 4**). Importantly, these sperm specific defects can  
390 be corrected by dietary supplementation of vitamin B<sub>2</sub>, which in light of the exceptional conservation of  
391 mitochondrial homeostatic pathways, suggest the nutraceutical role vitamin B<sub>2</sub> could play in sperm health  
392 across species.

393 Our study also demonstrates that spermatids lacking *alh-6* have increased mitochondrial fusion;  
394 a perturbation at the mitochondrial organelle structure-level that contributes to the sperm-specific  
395 phenotypes observed. In addition to prior work showing *fzo-1/MFN1/MFN2* and *drp-1/DRP-1* to be  
396 important for mitochondrial elimination post-fertilization (69), our work reveals that mitochondrial fission  
397 and fusion machinery are present and active in spermatids and that perturbation of these dynamics can  
398 affect sperm maturation and competitive fitness (**Figure 6**). Future work to define how *alh-6* spermatids  
399 use mitophagy, which can clear damaged mitochondria, will be of interest. In conclusion, our work  
400 identifies proline metabolism as a major metabolic pathway that can impact sperm maturation and male  
401 reproductive success. Moreover, these studies identify specific interventions to reverse the redox  
402 imbalance, cofactor depletion, and altered mitochondria dynamics, all of which play a part in sperm  
403 dysfunction resulting from proline metabolism defects.

404

405 **ACKNOWLEDGEMENTS**

406 We thank K. Han and L. Thomas for technical assistance, and H. Dalton and A. Hammerquist for critical  
407 reading of the manuscript. Some strains were provided by the CGC, which is funded by the NIH Office of  
408 Research Infrastructure Programs (P40 OD010440). This work was funded by the NIH (GM109028) and  
409 the Ellison Medical Foundation (S.P.C.) and the American Federation of Aging Research (C-A.Y. and  
410 S.P.C).

411

412

413

414 **AUTHOR CONTRIBUTIONS**

415 S.P.C. designed the study; C-A.Y., D.L.R., N.M., S.P., and S.P.C. performed the experiments; C-A.Y.  
416 and S.P.C. analyzed data and wrote the manuscript. All authors discussed the results and commented  
417 on the manuscript.

418

419

420

421 **COMPETING INTERESTS**

422 The authors declare no competing interests.

423

424

425

426 **DATA AVAILABILITY**

427 All relevant data are available from the authors.

## 428 **METHODS**

429

### 430 **C. elegans strains and maintenance**

431 *C. elegans* were cultured using standard techniques at 20°C. The following strains were used: wild type  
432 (WT) N2 Bristol, CB4856 (HW), SPC321[*alh-6(lax105)*], SP326[*alh-6p;alh-6::gfp*], CL2166[*gst4-p::gfp*],  
433 SPC223[*alh-6(lax105);gst-4p::gfp*], and CU6372[*drp-1(tm1108)*]. Double and triple mutants were  
434 generated by standard genetic techniques. *E. coli* strains used were as follows: B Strain OP50(80) and  
435 HT115(DE3) [F<sup>-</sup>mcrA mcrB IN(rrnD-rrnE)1 lambda<sup>-</sup> rnc14::Tn10 λ(DE3)](81). For dietary supplement  
436 assays, the following were added to the NGM plate mix to final concentration: 5mM NAC, 2.5mM  
437 riboflavin. RNAi experiments done using OP50 RNAi *E. coli* B strain as described in (82) yielded similar  
438 results as HT115-based RNAi. All strains were adapted to diets for at least three generations and strains  
439 were never allowed to starve.

440

### 441 **EMS mutagenesis**

442 Ethyl methanesulfonate (EMS) mutagenesis was performed as previously described (57). Briefly,  
443 SPC223[*alh-6(lax105);gst-4p::gfp*] was mutagenized with EMS, and F2 worms with reduced GFP  
444 expression (indicating suppression of SKN-1 activation) were selected. *prdh-1(lax228)* was isolated and  
445 mapped to chromosome IV. Whole genome sequencing and injection rescue confirmed mutant sequence  
446 identity.

447

### 448 **Microscopy**

449 Zeiss Axio Imager and ZEN software were used to acquire all images used in this study. For GFP reporter  
450 strains, worms were mounted in M9 with 10mM levamisole and imaged with DIC and GFP filters. For  
451 sperm number assay samples were imaged with DIC and DAPI filters in z-stacks. For sperm size and  
452 activation assays, dissected sperm samples were mounted with coverslip and imaged at 100x with DIC  
453 filter on two different focal planes for each field to ensure accuracy. For sperm mitochondria assays,  
454 dissected sperm samples were covered with coverslip and imaged at 100x with DIC, GFP, and RFP filters  
455 in z-stacks to assess overall mitochondria content within each spermatid.

456

### 457 **Fertility assay**

458 Worms were egg prepped and eggs were allowed to hatch overnight. The next day synchronized L1  
459 larvae were dropped on NGM plates seeded with either OP50 or HT115. 48 hrs later, at least ten L4  
460 hermaphrodites for each genotype were singled onto individual plates and moved every 14 hours until  
461 egg laying ceased. Progeny were counted 48 hours after the singled hermaphrodite was moved to a  
462 different place. Plates were counted twice for accuracy.

463

### 464 **Mated reproductive assay**

465 Males were synchronized by egg laying, picked as L4 larvae for use as young adults for mating  
466 experiments. L4 hermaphrodites were each put on a plate with 30ul of OP50 seeded in the center  
467 together with three young adult males. 24hrs post mating, males are removed, and each hermaphrodite  
468 was moved to a new plate every 24 hr until egg laying ceases. Progeny were counted 48 hours after  
469 hermaphrodite was moved from the plate. For sperm competition assay progeny with GFP fluorescence  
470 were counted from the cohort. Plates were counted twice for accuracy.

471

### 472 **Cofactor Measurements**

473 Worms were egg prepped and eggs were allowed to hatch overnight. Next day, synchronized L1s were  
474 dropped on NGM plates seeded with concentrated OP50. FAD levels are measured following directions  
475 in FAD Colorimetric/Fluorometric Assay Kit (K357) from BioVision.

476

### 477 **Sperm Number Assay**

478 Worms were egg prepped and eggs were allowed to hatch overnight. Next day, synchronized L1s were  
479 dropped on seeded NGM plates. 72 hrs post drop, day 1 adult animals were washed 3x with 1xPBST,  
480 fixed with 40% 2-propanol, and stained with DAPI for 2 hrs. Samples were washed for 30min with PBST,  
481 mounted with vectashield mounting medium, and covered with coverslip to image.

482

#### 483 **Sperm Size Assay**

484 Males were isolated at L4 stage 24 hour before assay. For each strain, five day 1 adult males were  
485 dissected in 35 $\mu$ L pH 7.8 SM buffer (50mM HEPES, 50mM NaCl, 25mM KCl, 5mM CaCl<sub>2</sub>, 1mM MgSO<sub>4</sub>,  
486 10mM dextrose) with DAPI to release spermatids and imaged.

487

#### 488 **Sperm Activation with Pronase**

489 Males were isolated at L4 stage 24 hour before assay. For each strain, five day 1 adult males were  
490 dissected in 35 $\mu$ L pH 7.8 SM buffer (50mM HEPES, 50mM NaCl, 25mM KCl, 5mM CaCl<sub>2</sub>, 1mM MgSO<sub>4</sub>,  
491 1mg/ml BSA) supplemented with 200 $\mu$ g/mL Pronase to release spermatids. Another 25ul of same  
492 solution was added and the spermatids were incubated at RT for 30 min for activation to occur.

493

#### 494 **Sperm Mitochondria Staining**

495 Males were isolated at L4 stage 24 hour before assay. For each strain, five day 1 adult males were  
496 dissected in 35 $\mu$ L pH 7.8 SM buffer (50mM HEPES, 50mM NaCl, 25mM KCl, 5mM CaCl<sub>2</sub>, 1mM MgSO<sub>4</sub>,  
497 1mg/ml BSA) with JC-1(Thermo Fisher Scientific T3168) added to 10 $\mu$ M final concentration. Another 25ul  
498 of same solution is added and the spermatids are incubated at RT for 10 min. Then the slide was washed  
499 three times with 100ul SM buffer before imaging.

500

#### 501 **RNA-sequencing**

502 Worms were egg prepped and eggs were allowed to hatch overnight. Next day, synchronized L1s were  
503 dropped on NGM plates seeded with concentrated OP50. 48 and 120 hrs post drop, L4 animals and day  
504 3 adult animals, respectively, were washed 3 times with M9 and frozen in TRI Reagent at -80°C. Animals  
505 are homogenized and RNA extraction is performed following protocol in Zymo Direct-zol RNA Isolation  
506 Kit. RNA samples were sequenced and analyzed by Novogene.

507

#### 508 **Statistical analysis**

509 Data are presented as mean  $\pm$  SEM. Comparisons and significance were analyzed in Graphpad Prism  
510 7. Comparisons between two groups were done using Student's Test. Comparisons between more than  
511 two groups were done using ANOVA. For sperm activation assays, Fisher's Exact Test was used and  
512 p-values are adjusted for multiple comparisons. \*p<0.05 \*\*p<0.01 \*\*\* p<0.001 \*\*\*\*<0.0001

513

514

515

516

517 **REFERENCES**

- 518 1. Mills M, *et al.* (2011) Why do people postpone parenthood? Reasons and social policy  
519 incentives. *Hum Reprod Update* 17(6):848-860.
- 520 2. Lemaitre JF & Gaillard JM (2017) Reproductive senescence: new perspectives in the wild. *Biol*  
521 *Rev Camb Philos Soc* 92(4):2182-2199.
- 522 3. Baird DT, *et al.* (2005) Fertility and ageing. *Hum Reprod Update* 11(3):261-276.
- 523 4. Treloar AE (1981) Menstrual cyclicity and the pre-menopause. *Maturitas* 3(3-4):249-264.
- 524 5. Kadandale P & Singson A (2004) Oocyte production and sperm utilization patterns in semi-  
525 fertile strains of *Caenorhabditis elegans*. *BMC Dev Biol* 4:3.
- 526 6. Luo S, Kleemann GA, Ashraf JM, Shaw WM, & Murphy CT (2010) TGF-beta and insulin  
527 signaling regulate reproductive aging via oocyte and germline quality maintenance. *Cell*  
528 143(2):299-312.
- 529 7. Cocuzza M, *et al.* (2008) Age-related increase of reactive oxygen species in neat semen in  
530 healthy fertile men. *Urology* 71(3):490-494.
- 531 8. Kidd SA, Eskenazi B, & Wyrobek AJ (2001) Effects of male age on semen quality and fertility: a  
532 review of the literature. *Fertil Steril* 75(2):237-248.
- 533 9. Ozkosem B, Feinstein SI, Fisher AB, & O'Flaherty C (2015) Advancing age increases sperm  
534 chromatin damage and impairs fertility in peroxiredoxin 6 null mice. *Redox Biol* 5:15-23.
- 535 10. Sena LA & Chandel NS (2012) Physiological roles of mitochondrial reactive oxygen species.  
536 *Mol Cell* 48(2):158-167.
- 537 11. Murphy MP (2009) How mitochondria produce reactive oxygen species. *Biochem J* 417(1):1-13.
- 538 12. Mundy AJ, Ryder TA, & Edmonds DK (1995) Asthenozoospermia and the human sperm mid-  
539 piece. *Hum Reprod* 10(1):116-119.
- 540 13. Pelliccione F, *et al.* (2011) Altered ultrastructure of mitochondrial membranes is strongly  
541 associated with unexplained asthenozoospermia. *Fertil Steril* 95(2):641-646.
- 542 14. Ruiz-Pesini E, *et al.* (2000) Human mtDNA haplogroups associated with high or reduced  
543 spermatozoa motility. *Am J Hum Genet* 67(3):682-696.
- 544 15. Diez-Sanchez C, *et al.* (2003) Mitochondrial DNA content of human spermatozoa. *Biol Reprod*  
545 68(1):180-185.
- 546 16. Nakada K, *et al.* (2006) Mitochondria-related male infertility. *Proc Natl Acad Sci U S A*  
547 103(41):15148-15153.
- 548 17. Amaral A, Ramalho-Santos J, & St John JC (2007) The expression of polymerase gamma and  
549 mitochondrial transcription factor A and the regulation of mitochondrial DNA content in mature  
550 human sperm. *Hum Reprod* 22(6):1585-1596.
- 551 18. Song GJ & Lewis V (2008) Mitochondrial DNA integrity and copy number in sperm from infertile  
552 men. *Fertil Steril* 90(6):2238-2244.
- 553 19. Zhao C, *et al.* (2007) Identification of several proteins involved in regulation of sperm motility by  
554 proteomic analysis. *Fertil Steril* 87(2):436-438.
- 555 20. Martinez-Heredia J, de Mateo S, Vidal-Taboada JM, Balleca JL, & Oliva R (2008) Identification  
556 of proteomic differences in asthenozoospermic sperm samples. *Hum Reprod* 23(4):783-791.
- 557 21. Chan CC, *et al.* (2009) Motility and protein phosphorylation in healthy and asthenozoospermic  
558 sperm. *J Proteome Res* 8(11):5382-5386.
- 559 22. Ruiz-Pesini E, *et al.* (1998) Correlation of sperm motility with mitochondrial enzymatic activities.  
560 *Clin Chem* 44(8 Pt 1):1616-1620.
- 561 23. Ruiz-Pesini E, *et al.* (2000) Seminal quality correlates with mitochondrial functionality. *Clin Chim*  
562 *Acta* 300(1-2):97-105.
- 563 24. Narisawa S, *et al.* (2002) Testis-specific cytochrome c-null mice produce functional sperm but  
564 undergo early testicular atrophy. *Mol Cell Biol* 22(15):5554-5562.
- 565 25. de Lamirande E & Gagnon C (1993) A positive role for the superoxide anion in triggering  
566 hyperactivation and capacitation of human spermatozoa. *Int J Androl* 16(1):21-25.

- 567 26. Kodama H, Kuribayashi Y, & Gagnon C (1996) Effect of sperm lipid peroxidation on fertilization. *J Androl* 17(2):151-157.
- 568
- 569 27. Leclerc P, de Lamirande E, & Gagnon C (1997) Regulation of protein-tyrosine phosphorylation  
570 and human sperm capacitation by reactive oxygen derivatives. *Free Radic Biol Med* 22(4):643-  
571 656.
- 572 28. Tremellen K (2008) Oxidative stress and male infertility--a clinical perspective. *Hum Reprod*  
573 *Update* 14(3):243-258.
- 574 29. Agarwal A, Virk G, Ong C, & du Plessis SS (2014) Effect of oxidative stress on male  
575 reproduction. *World J Mens Health* 32(1):1-17.
- 576 30. Koppers AJ, De Iuliis GN, Finnie JM, McLaughlin EA, & Aitken RJ (2008) Significance of  
577 mitochondrial reactive oxygen species in the generation of oxidative stress in spermatozoa. *J*  
578 *Clin Endocrinol Metab* 93(8):3199-3207.
- 579 31. Aitken RJ, *et al.* (2012) Sperm motility is lost in vitro as a consequence of mitochondrial free  
580 radical production and the generation of electrophilic aldehydes but can be significantly rescued  
581 by the presence of nucleophilic thiols. *Biol Reprod* 87(5):110.
- 582 32. Grad LI & Lemire BD (2004) Mitochondrial complex I mutations in *Caenorhabditis elegans*  
583 produce cytochrome c oxidase deficiency, oxidative stress and vitamin-responsive lactic  
584 acidosis. *Hum Mol Genet* 13(3):303-314.
- 585 33. Jonassen T, Marbois BN, Faull KF, Clarke CF, & Larsen PL (2002) Development and fertility in  
586 *Caenorhabditis elegans* clk-1 mutants depend upon transport of dietary coenzyme Q8 to  
587 mitochondria. *J Biol Chem* 277(47):45020-45027.
- 588 34. Adams E & Frank L (1980) Metabolism of proline and the hydroxyprolines. *Annu Rev Biochem*  
589 49:1005-1061.
- 590 35. Pang S & Curran SP (2014) Adaptive Capacity to Bacterial Diet Modulates Aging in *C. elegans*.  
591 *Cell Metab* 19(2):221-231.
- 592 36. Pang S, Lynn DA, Lo JY, Paek J, & Curran SP (2014) SKN-1 and Nrf2 couples proline  
593 catabolism with lipid metabolism during nutrient deprivation. *Nat Commun* 5:5048.
- 594 37. Deuschle K, *et al.* (2004) The role of [Delta]1-pyrroline-5-carboxylate dehydrogenase in proline  
595 degradation. *Plant Cell* 16(12):3413-3425.
- 596 38. Miller G, *et al.* (2009) Unraveling delta1-pyrroline-5-carboxylate-proline cycle in plants by  
597 uncoupled expression of proline oxidation enzymes. *J Biol Chem* 284(39):26482-26492.
- 598 39. Nomura M & Takagi H (2004) Role of the yeast acetyltransferase Mpr1 in oxidative stress:  
599 regulation of oxygen reactive species caused by a toxic proline catabolism intermediate. *Proc*  
600 *Natl Acad Sci U S A* 101(34):12616-12621.
- 601 40. Palikaras K, Lionaki E, & Tavernarakis N (2015) Coupling mitogenesis and mitophagy for  
602 longevity. *Autophagy* 11(8):1428-1430.
- 603 41. Liao WS, Gonzalez-Serricchio AS, Deshombres C, Chin K, & LaMunyon CW (2007) A persistent  
604 mitochondrial deletion reduces fitness and sperm performance in heteroplasmic populations of  
605 *C. elegans*. *BMC Genet* 8:8.
- 606 42. Amaral A, Lourenco B, Marques M, & Ramalho-Santos J (2013) Mitochondria functionality and  
607 sperm quality. *Reproduction* 146(5):R163-174.
- 608 43. Ramalho-Santos J & Amaral S (2013) Mitochondria and mammalian reproduction. *Mol Cell*  
609 *Endocrinol* 379(1-2):74-84.
- 610 44. McCarter J, Bartlett B, Dang T, & Schedl T (1999) On the control of oocyte meiotic maturation  
611 and ovulation in *Caenorhabditis elegans*. *Dev Biol* 205(1):111-128.
- 612 45. Ward S & Miwa J (1978) Characterization of temperature-sensitive, fertilization-defective  
613 mutants of the nematode *caenorhabditis elegans*. *Genetics* 88(2):285-303.
- 614 46. Argon Y & Ward S (1980) *Caenorhabditis elegans* fertilization-defective mutants with abnormal  
615 sperm. *Genetics* 96(2):413-433.
- 616 47. Ward S & Carrel JS (1979) Fertilization and sperm competition in the nematode *Caenorhabditis*  
617 *elegans*. *Dev Biol* 73(2):304-321.

- 618 48. LaMunyon CW & Ward S (1995) Sperm precedence in a hermaphroditic nematode  
619 (Caenorhabditis elegans) is due to competitive superiority of male sperm. *Experientia* 51(8):817-  
620 823.
- 621 49. Singson A, Hill KL, & L'Hernault SW (1999) Sperm competition in the absence of fertilization in  
622 Caenorhabditis elegans. *Genetics* 152(1):201-208.
- 623 50. Hirsh D, Oppenheim D, & Klass M (1976) Development of the reproductive system of  
624 Caenorhabditis elegans. *Dev Biol* 49(1):200-219.
- 625 51. Hansen JM, Chavez DR, & Stanfield GM (2015) COMP-1 promotes competitive advantage of  
626 nematode sperm. *Elife* 4.
- 627 52. LaMunyon CW & Ward S (2002) Evolution of larger sperm in response to experimentally  
628 increased sperm competition in Caenorhabditis elegans. *Proc Biol Sci* 269(1496):1125-1128.
- 629 53. LaMunyon CW & Ward S (1998) Larger sperm outcompete smaller sperm in the nematode  
630 Caenorhabditis elegans. *Proc Biol Sci* 265(1409):1997-2002.
- 631 54. Ward S, Hogan E, & Nelson GA (1983) The initiation of spermiogenesis in the nematode  
632 Caenorhabditis elegans. *Dev Biol* 98(1):70-79.
- 633 55. Shakes DC & Ward S (1989) Initiation of spermiogenesis in C. elegans: a pharmacological and  
634 genetic analysis. *Dev Biol* 134(1):189-200.
- 635 56. Blackwell TK, Steinbaugh MJ, Hourihan JM, Ewald CY, & Isik M (2015) SKN-1/Nrf, stress  
636 responses, and aging in Caenorhabditis elegans. *Free Radic Biol Med* 88(Pt B):290-301.
- 637 57. Paek J, et al. (2012) Mitochondrial SKN-1/Nrf mediates a conserved starvation response. *Cell*  
638 *Metab* 16(4):526-537.
- 639 58. Glover-Cutter KM, Lin S, & Blackwell TK (2013) Integration of the unfolded protein and oxidative  
640 stress responses through SKN-1/Nrf. *PLoS Genet* 9(9):e1003701.
- 641 59. An JH & Blackwell TK (2003) SKN-1 links C. elegans mesendodermal specification to a  
642 conserved oxidative stress response. *Genes & development* 17(15):1882-1893.
- 643 60. Lynn DA, et al. (2015) Omega-3 and -6 fatty acids allocate somatic and germline lipids to  
644 ensure fitness during nutrient and oxidative stress in Caenorhabditis elegans. *Proc Natl Acad*  
645 *Sci U S A* 112(50):15378-15383.
- 646 61. Palikaras K, Lionaki E, & Tavernarakis N (2015) Coordination of mitophagy and mitochondrial  
647 biogenesis during ageing in C. elegans. *Nature* 521(7553):525-528.
- 648 62. Burch HB, Combs AM, Lowry OH, & Padilla AM (1956) Effects of riboflavin deficiency and  
649 realimentation on flavin enzymes of tissues. *J Biol Chem* 223(1):29-45.
- 650 63. Redondo A, Menasche P, & Le Beau J (1975) [Operation for stenosis of the internal carotid  
651 artery secondary to irradiation (a propos of 1 observation)]. *Neurochirurgie* 21(3):239-245.
- 652 64. Blankenberg D, et al. (2010) Galaxy: a web-based genome analysis tool for experimentalists.  
653 *Curr Protoc Mol Biol* Chapter 19:Unit 19 10 11-21.
- 654 65. Yoon KA, Nakamura Y, & Arakawa H (2004) Identification of ALDH4 as a p53-inducible gene  
655 and its protective role in cellular stresses. *J Hum Genet* 49(3):134-140.
- 656 66. Tondera D, et al. (2009) SLP-2 is required for stress-induced mitochondrial hyperfusion. *Embo J*  
657 28(11):1589-1600.
- 658 67. Gomes LC, Di Benedetto G, & Scorrano L (2011) Essential amino acids and glutamine regulate  
659 induction of mitochondrial elongation during autophagy. *Cell Cycle* 10(16):2635-2639.
- 660 68. Rambold AS, Kostecky B, Elia N, & Lippincott-Schwartz J (2011) Tubular network formation  
661 protects mitochondria from autophagosomal degradation during nutrient starvation. *Proc Natl*  
662 *Acad Sci U S A* 108(25):10190-10195.
- 663 69. Wang Y, et al. (2016) Kinetics and specificity of paternal mitochondrial elimination in  
664 Caenorhabditis elegans. *Nat Commun* 7:12569.
- 665 70. Smirnova E, Griparic L, Shurland DL, & van der Bliek AM (2001) Dynamin-related protein Drp1  
666 is required for mitochondrial division in mammalian cells. *Mol Biol Cell* 12(8):2245-2256.
- 667 71. Lima AR, et al. (2018) Dynamin-Related Protein 1 at the Crossroads of Cancer. *Genes (Basel)*  
668 9(2).

- 669 72. van der Blik AM, Sedensky MM, & Morgan PG (2017) Cell Biology of the Mitochondrion.  
670 *Genetics* 207(3):843-871.
- 671 73. Shaw JM & Nunnari J (2002) Mitochondrial dynamics and division in budding yeast. *Trends Cell*  
672 *Biol* 12(4):178-184.
- 673 74. Wagner H, Cheng JW, & Ko EY (2018) Role of reactive oxygen species in male infertility: An  
674 updated review of literature. *Arab J Urol* 16(1):35-43.
- 675 75. Cocuzza M, Sikka SC, Athayde KS, & Agarwal A (2007) Clinical relevance of oxidative stress  
676 and sperm chromatin damage in male infertility: an evidence based analysis. *Int Braz J Urol*  
677 33(5):603-621.
- 678 76. Jose-Miller AB, Boyden JW, & Frey KA (2007) Infertility. *Am Fam Physician* 75(6):849-856.
- 679 77. Jung A, Schuppe HC, & Schill WB (2002) Comparison of semen quality in older and younger  
680 men attending an andrology clinic. *Andrologia* 34(2):116-122.
- 681 78. Plastira K, *et al.* (2007) The effects of age on DNA fragmentation, chromatin packaging and  
682 conventional semen parameters in spermatozoa of oligoasthenoteratozoospermic patients. *J*  
683 *Assist Reprod Genet* 24(10):437-443.
- 684 79. Powers HJ (2003) Riboflavin (vitamin B-2) and health. *Am J Clin Nutr* 77(6):1352-1360.
- 685 80. Brenner S (1974) The genetics of *Caenorhabditis elegans*. *Genetics* 77(1):71-94.
- 686 81. Timmons L, Court DL, & Fire A (2001) Ingestion of bacterially expressed dsRNAs can produce  
687 specific and potent genetic interference in *Caenorhabditis elegans*. *Gene* 263(1-2):103-112.
- 688 82. Dalton HM & Curran SP (2018) Hypodermal responses to protein synthesis inhibition induce  
689 systemic developmental arrest and AMPK-dependent survival in *Caenorhabditis elegans*. *PLoS*  
690 *Genet* 14(7):e1007520.
- 691
- 692



693  
694

## FIGURES

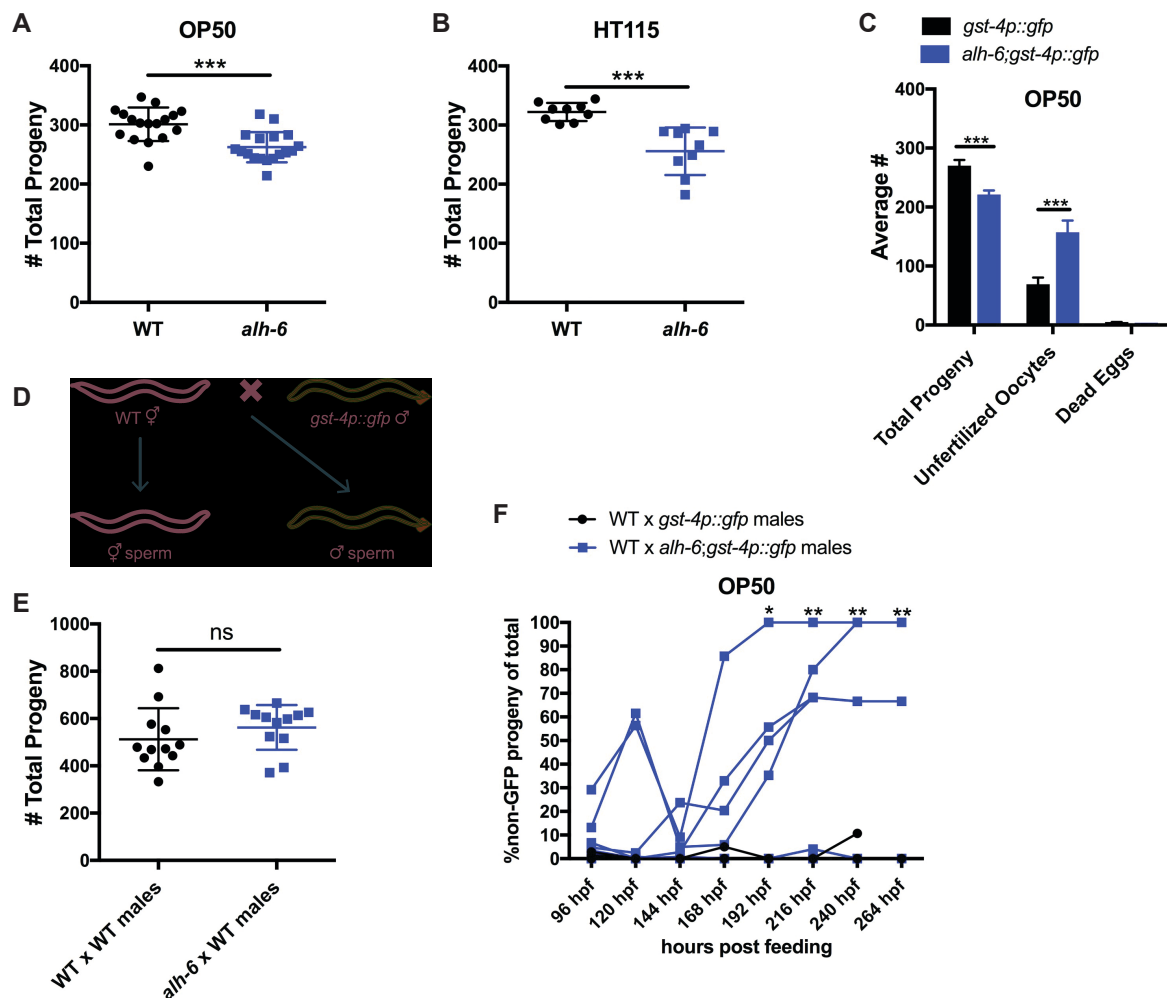

695  
696  
697  
698  
699  
700  
701  
702  
703  
704  
705  
706  
707

**Figure 1. *alh-6* fertility defects are sperm-specific.** (a-b) *alh-6* hermaphrodites have reduced brood size when fed OP50 (a) or HT115 (b) diets. (c) *alh-6* hermaphrodites have increased unfertilized oocytes and few dead embryos. (d) Mated reproductive assay scheme utilizes males to maximize reproductive output (as in e) and can exploit males harboring GFP to differentiate progeny resulting from self- versus male-sperm (as in f). (e) Wild type (WT) and *alh-6* hermaphrodites mated with WT males yield similar number of total progeny. (f) WT hermaphrodites mated with *alh-6;gst-4p::gfp* yield more non-GFP progeny, indicating self-fertilization, than hermaphrodites mated with wild type males harboring *gst-4p::gfp*. Statistical comparisons by unpaired t-test. \*,  $p < 0.05$ ; \*\*,  $p < 0.01$ ; \*\*\*,  $p < 0.001$ ; \*\*\*\*,  $p < 0.0001$ . All studies performed in biological triplicate; refer to Table S1 for n for each comparison.

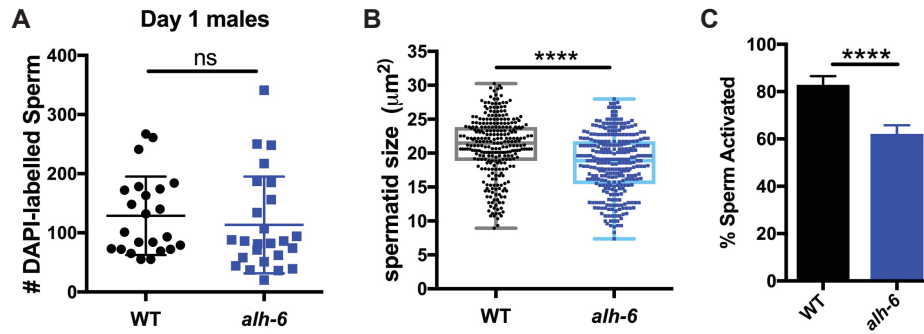

708

709

**Figure 2. *alh-6* males have sperm defects.** (a) Sperm quantity is similar between wild type (WT) and *alh-6* mutant day 1 adult males. (b) Spermatid size is reduced in *alh-6* mutant day 1 adult males as compared to age matched WT males. (c) Sperm activation is impaired in *alh-6* mutant day 1 adult males relative to age-matched WT males. Statistical comparisons of sperm number and size by unpaired t-test and sperm activation by Fisher's exact test. \*,  $p < 0.05$ ; \*\*,  $p < 0.01$ ; \*\*\*,  $p < 0.001$ ; \*\*\*\*,  $p < 0.0001$ . All studies performed in biological triplicate; refer to Table S1 for n for each comparison.

715

716

717

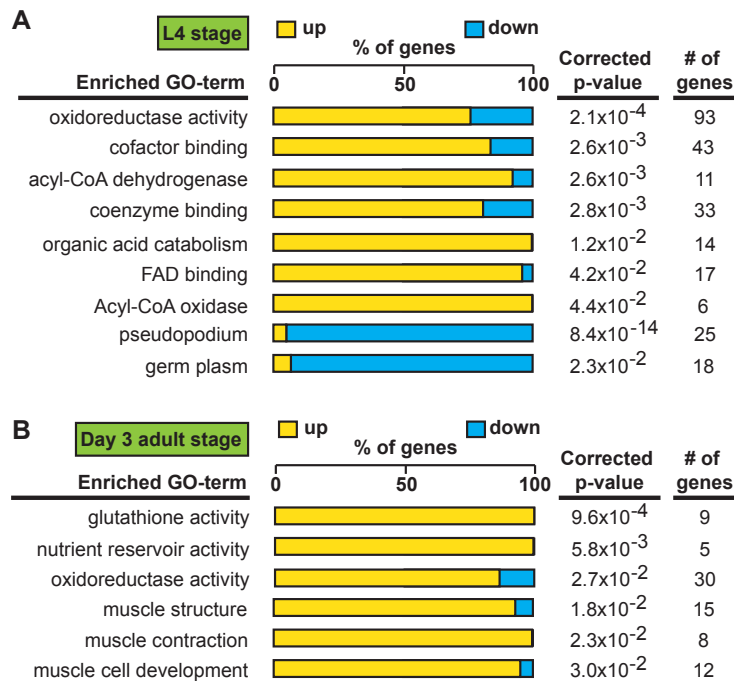

718  
719  
720  
721  
722  
723  
724  
725

**Figure 3. Transcriptional patterns define developmental- and adult-specific consequences to loss of *alh-6* activity.** Gene Ontology (GO) term enrichment analysis of RNAseq data. (a) Transcriptional changes at L4 stage are enriched for metabolism and sperm-specific genes. (b) Transcriptional changes at day 3 adulthood are enriched for changes in glutathione activity, oxidoreductase activity, and muscle-specific genes.

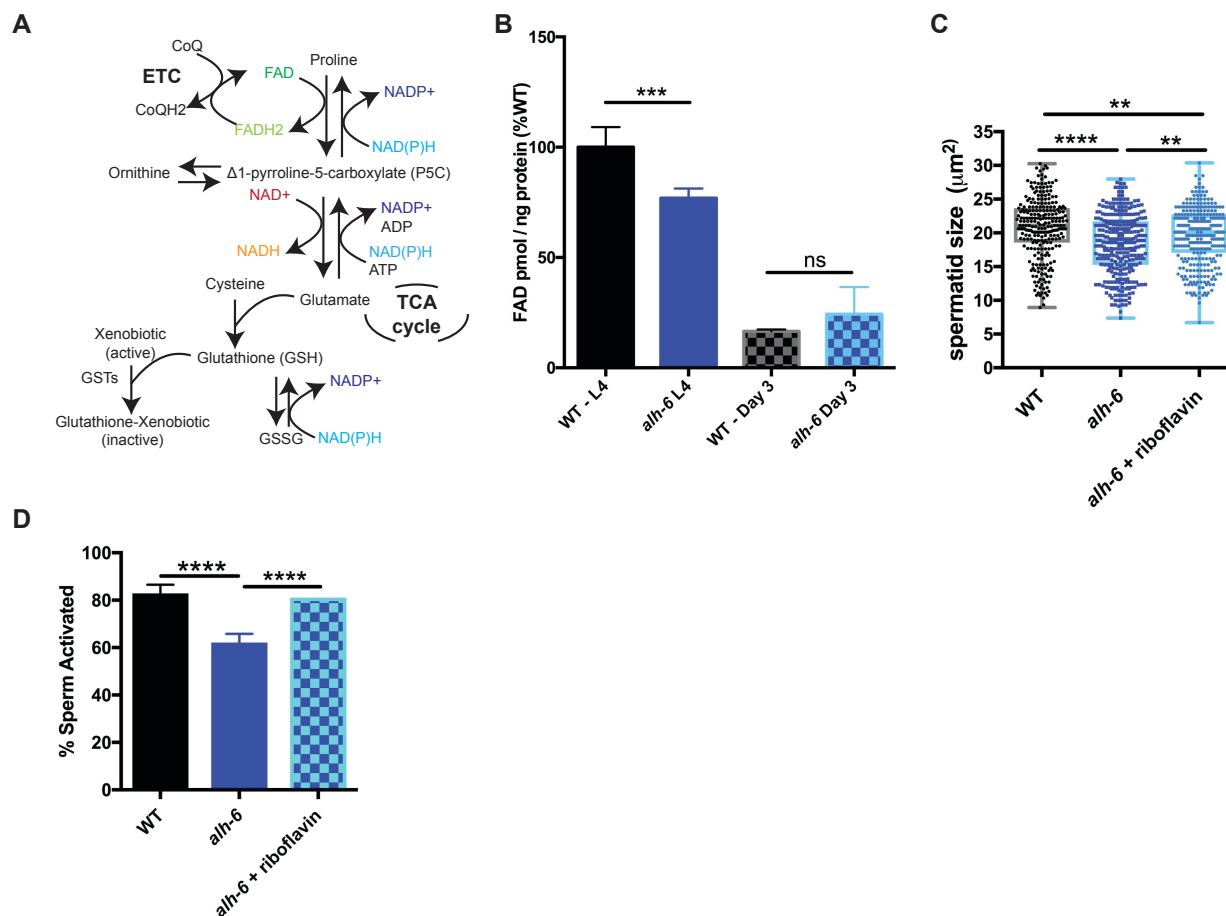

726  
727  
728  
729  
730  
731  
732  
733  
734  
735

**Figure 4. Loss of FAD homeostasis in *alh-6* mutants leads to sperm dysfunction.** (a) Metabolic pathways utilize adenine dinucleotide cofactors to maintain redox balance in cells. (b) FAD<sup>+</sup> levels are reduced in *alh-6* mutant animals at the L4 developmental stage. (c-d) Dietary supplement of riboflavin restores sperm size (c) and sperm activation (d) in sperm from *alh-6* mutants. Statistical comparisons of sperm size by ANOVA. Statistical comparisons of activation by fisher's exact test with p-value cut-off adjusted by number of comparisons. \*, p<0.05; \*\*, p<0.01; \*\*\*, p<0.001; \*\*\*\*, p<0.0001. All studies performed in biological triplicate; refer to Table S1 for n for each comparison.

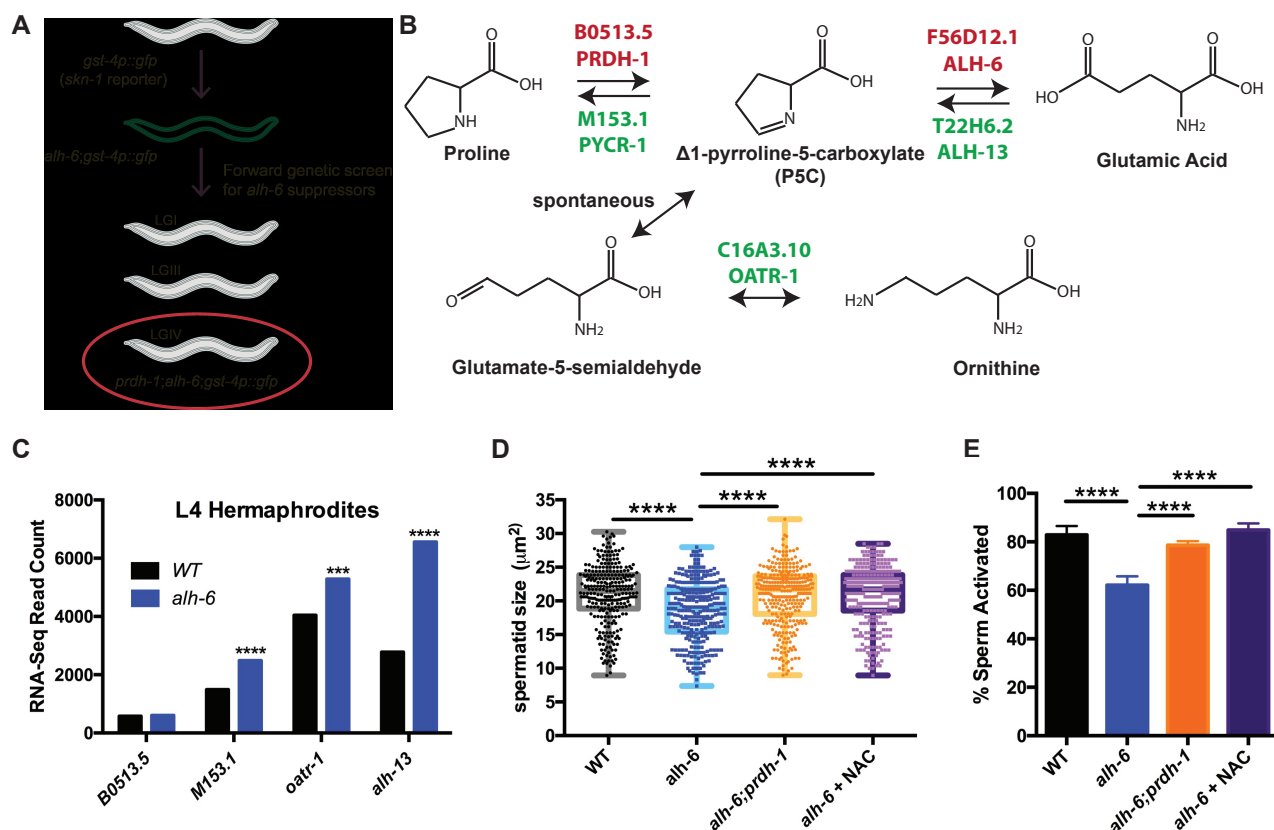

736  
737  
738  
739  
740  
741  
742  
743  
744  
745  
746

**Figure 5. Redox imbalance drives sperm defects in *alh-6* mutants.** (a) Cartoon depiction of EMS screen for suppressors of the SKN-1 reporter activation in *alh-6* mutants. (b) Schematic of biosynthetic and catabolic pathways of proline in *C. elegans*. (c) *M153.1*, *oatr-1*, and *alh-13* are upregulated in *alh-6* mutant L4 animals. (d-e) *prdh-1* mutation or dietary antioxidant supplementation rescues sperm size (d) and spermatid activation (e). Statistical comparisons of sperm size by ANOVA and statistical comparisons of sperm activation by Fisher's exact test with p-value cut-off adjusted by number of comparisons. \*, p<0.05; \*\*, p<0.01; \*\*\*, p<0.001; \*\*\*\*, p<0.0001. All studies performed in biological triplicate; refer to Table S1 for n for each comparison.

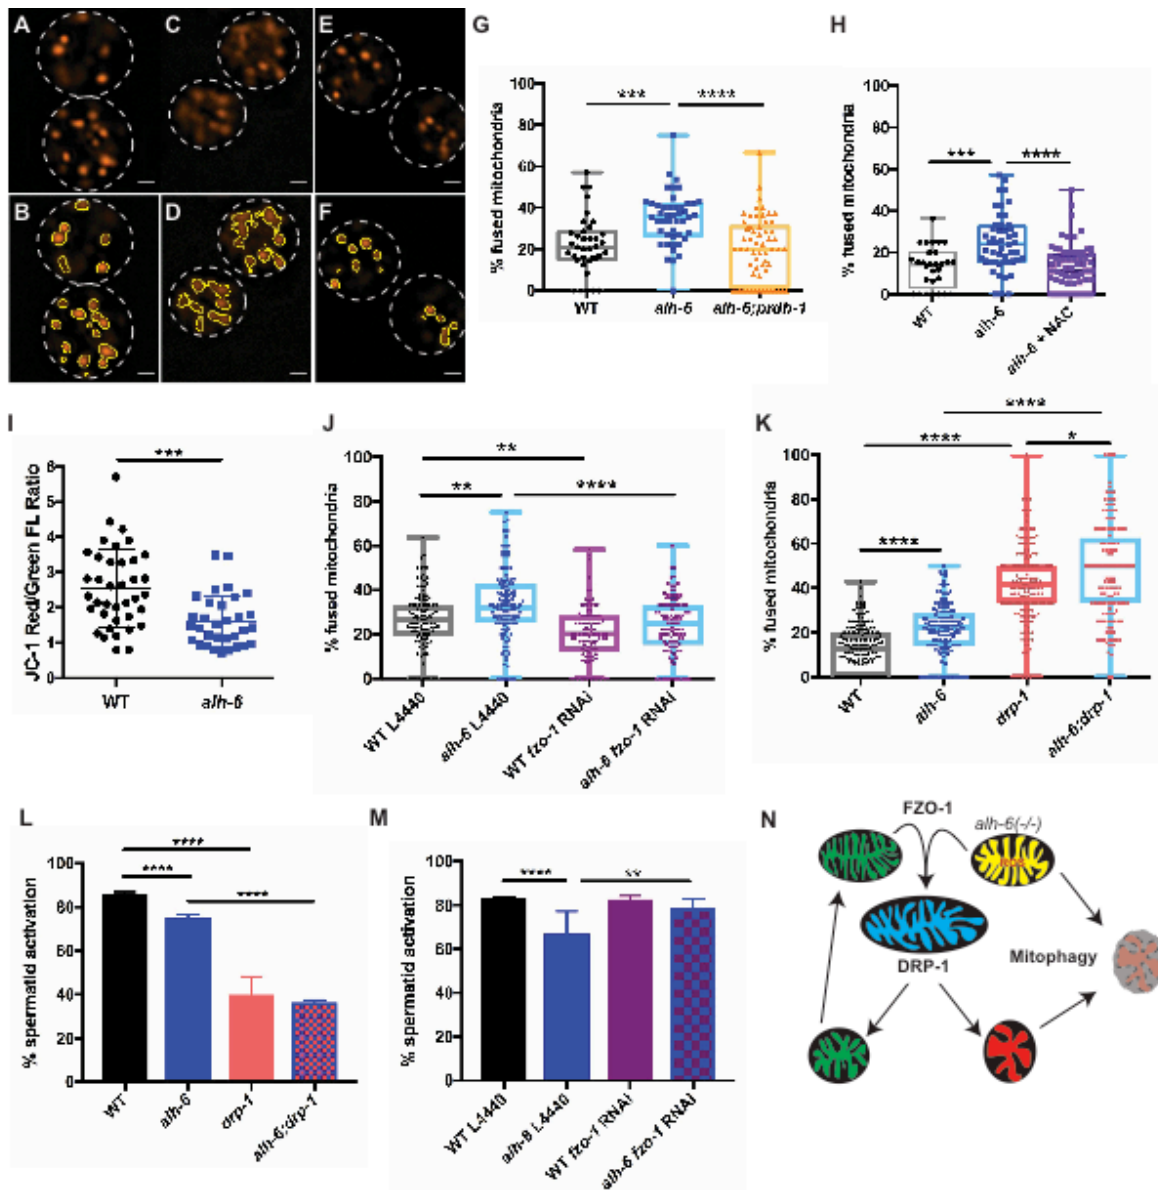

747  
 748 **Figure 6. Mitochondrial dynamics drive sperm quality.** (a-f) JC-1 dye stained mitochondria of WT (a-  
 749 b), *alh-6* mutant (c-d), *prdh-1;alh-6* mutant (e-f) spermatids from dissected males; b, d, f are ImageJ detection  
 750 of JC-1 stained sperm mitochondria area. (g) *alh-6* mutant male spermatids have increased number of  
 751 fused mitochondria, which is restored to WT levels in *prdh-1;alh-6* mutants. (h) Antioxidant treatment  
 752 restores mitochondrial dynamics to wild type levels in *alh-6* mutant spermatids. (i) Mitochondria in *alh-6*  
 753 mutant spermatids have reduced JC-1 red/green fluorescence ratio, indicating mitochondria depolarization.  
 754 (j) *fzo-1* RNAi decreases mitochondrial fusion in both WT and *alh-6* mutant spermatids. (k) *drp-1*  
 755 mutation increases mitochondrial fusion in spermatids. (l) *drp-1* mutation significantly impairs sperm  
 756 activation in both WT and *alh-6* mutant spermatids. (m) *fzo-1* RNAi restores sperm activation in *alh-6*  
 757 mutant (n) Model: *alh-6* mutation results in increased fusion in sperm mitochondria that is mediated by  
 758 *fzo-1*, which results in impaired sperm activation. Statistical comparisons of JC-1 Red/Green FL ratio by unpaired t-test.  
 759 Statistical comparisons of mitochondria fusion by ANOVA. Statistical comparisons of sperm activation by  
 760 Fisher's exact test with p-value cut-off adjusted by number of comparisons. \*, p<0.05; \*\*, p<0.01; \*\*\*,  
 761 p<0.001; \*\*\*\*, p<0.0001. All studies performed in biological triplicate; refer to Table S1 for n for each  
 762 comparison.

763 **SUPPLEMENTAL FIGURE LEGENDS**

764

765 **Figure S1. Cartoon depiction of proline catabolism pathway in *C. elegans*.**

766

767 **Figure S2. ALH-6 expression in the germline.** UV integrated *alh-6::gfp* strain under its endogenous  
768 promoter reveal expression of ALH-6 in hermaphrodite (a-b) and male (c-d) germline. a and c are DIC  
769 images while b and b are GFP images.

770

771 **Figure S3. *alh-6* hermaphrodite reproductive span is similar to wild type (WT) on different diets.**  
772 Progeny output time-courses are plotted as % total progeny for each time point. WT and *alh-6* mutant  
773 have similar output on OP50 (a) and HT115 (b). Significance indicate differences in progeny output at a  
774 particular time point done by multiple t-tests. \*, p<0.05; \*\*, p<0.01; \*\*\*, p<0.001; \*\*\*\*, p<0.0001. All studies  
775 performed in biological triplicate; refer to Table S1 for n for each comparison.

776

777 **Figure S4. *alh-6* fertility defects are sperm-specific.** (a) Day 4 adult WT hermaphrodites mated to  
778 either *gst-4p::gfp* or *alh-6;gst-4p::gfp* males yield similar total brood size. (b) Day 4 adult *alh-6*  
779 hermaphrodites mated to either *gst-4p::gfp* or *alh-6;gst-4p::gfp* males yield similar total brood size.  
780 Comparisons made with unpaired t-test. \*, p<0.05; \*\*, p<0.01; \*\*\*, p<0.001; \*\*\*\*, p<0.0001. All studies  
781 performed in biological triplicate; refer to Table S1 for n for each comparison.

782

783 **Figure S5. Sperm defects in *alh-6* mutants.** (a) *alh-6* hermaphrodites have reduced sperm number as  
784 day 1 adults. (b) Spermiogenesis stages. Spermatozoa with fully formed pseudopods are considered  
785 activated.

786

787 **Figure S6. RNA-Sequencing data of WT and *alh-6* hermaphrodites at L4 and day 3 adulthood.** (a)  
788 Number of genes that are significantly upregulated in *alh-6(lax105)* compared to WT at L4 and Day 3 adult  
789 stages. (b) Number of genes that are significantly downregulated in *alh-6(lax105)* compared to WT at L4  
790 and Day 3 adult stages. FDR = 0.05. All studies performed in biological triplicate; refer to Table S1 for n  
791 for each comparison.

792

793 **Figure S7. Adenine nucleotide cofactor homeostasis is disrupted in *alh-6* mutants.** WT  
794 hermaphrodite mated to *alh-6;gst-4p::gfp* males fed OP50 supplemented with 2.5mM riboflavin results in  
795 increase in total brood size compared to non-supplemented *alh-6;gst-4p::gfp* males. \*, p<0.05; \*\*,  
796 p<0.01; \*\*\*, p<0.001; \*\*\*\*, p<0.0001. All studies performed in biological triplicate; refer to Table S1 for n  
797 for each comparison.

798

799 **Figure S8. *prdh-1* mutation is causal for suppression of increased SKN-1 activity in *alh-6*.** (a) Day  
800 3 adult *alh-6;gst-4p::gfp* fed L4440 (control RNAi) are bright green on the muscle. B) Day 3 adult *alh-*  
801 *6;gst-4p::gfp* fed *prdh-1* RNAi are dim green on the muscle.

802

803 **Figure S9. *prdh-1* activity is required for sperm-specific fertility defects in *alh-6* mutants.** (a-c)  
804 *prdh-1* mutation rescues reduced brood size and increased number of unfertilized oocytes (a), reduced  
805 sperm number (b), and sperm competition (b) in *alh-6* animals. *gst-4p::gfp* reporter strains were used for a  
806 and c. Comparisons of A was done using ANOVA. All studies performed in biological triplicate; refer to  
807 Table S1 for n for each comparison.

808

809

810 **Figure S10. Dietary supplement of antioxidant NAC does not impact sperm function in wild type or**  
811 ***prdh-1* mutants.** Dietary supplementation of 5mM NAC does not affect WT sperm size (a) or sperm  
812 activation (b). Dietary NAC supplementation does not alter *prdh-1;alh-6* sperm size (c) or sperm activation

813 (d). Comparisons of groups are done in using ANOVA. Comparisons of sperm activation are done using  
814 Fisher's exact test with adjusted p-value cutoffs. \*,  $p < 0.05$ ; \*\*,  $p < 0.01$ ; \*\*\*,  $p < 0.001$ ; \*\*\*\*,  $p < 0.0001$ . All  
815 studies performed in biological triplicate; refer to Table S1 for n for each comparison.



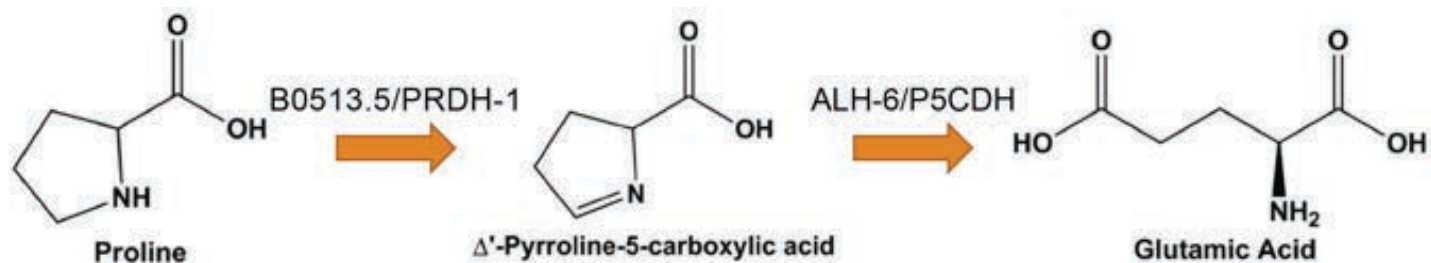

Supplemental Figure 1

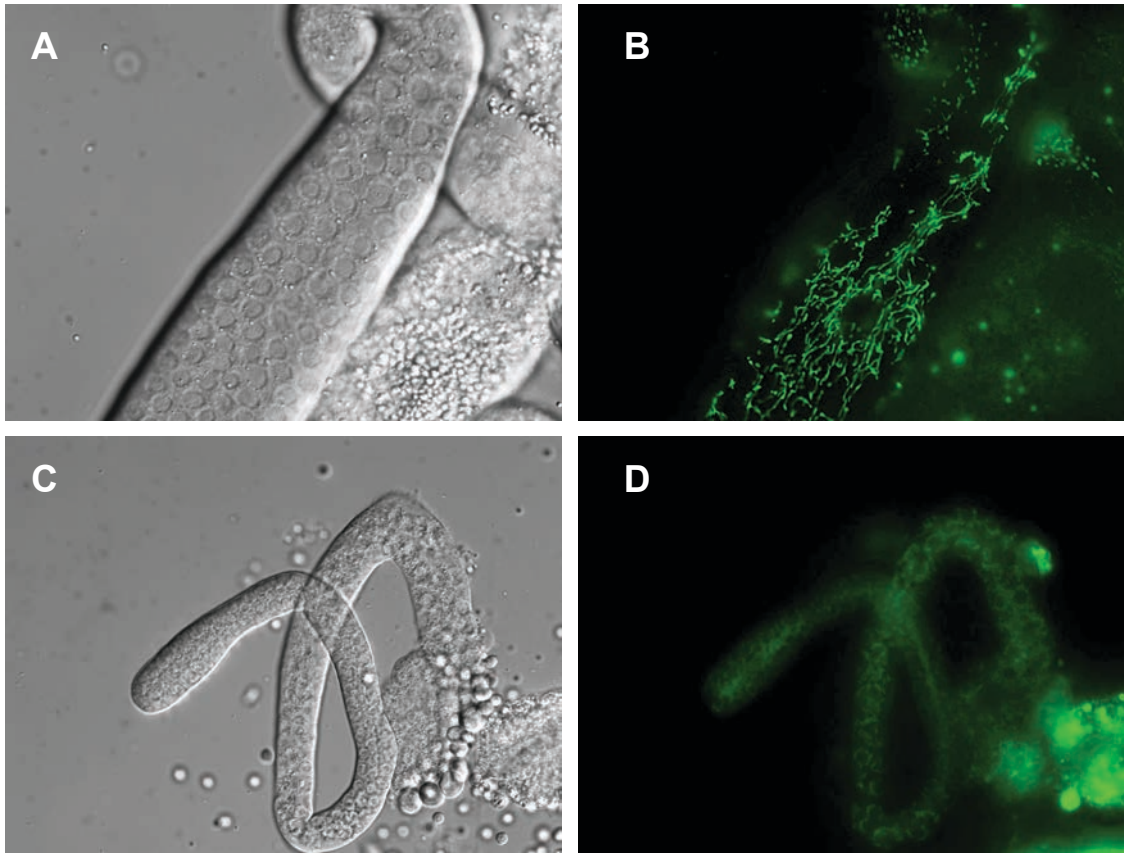

Supplemental Figure 2

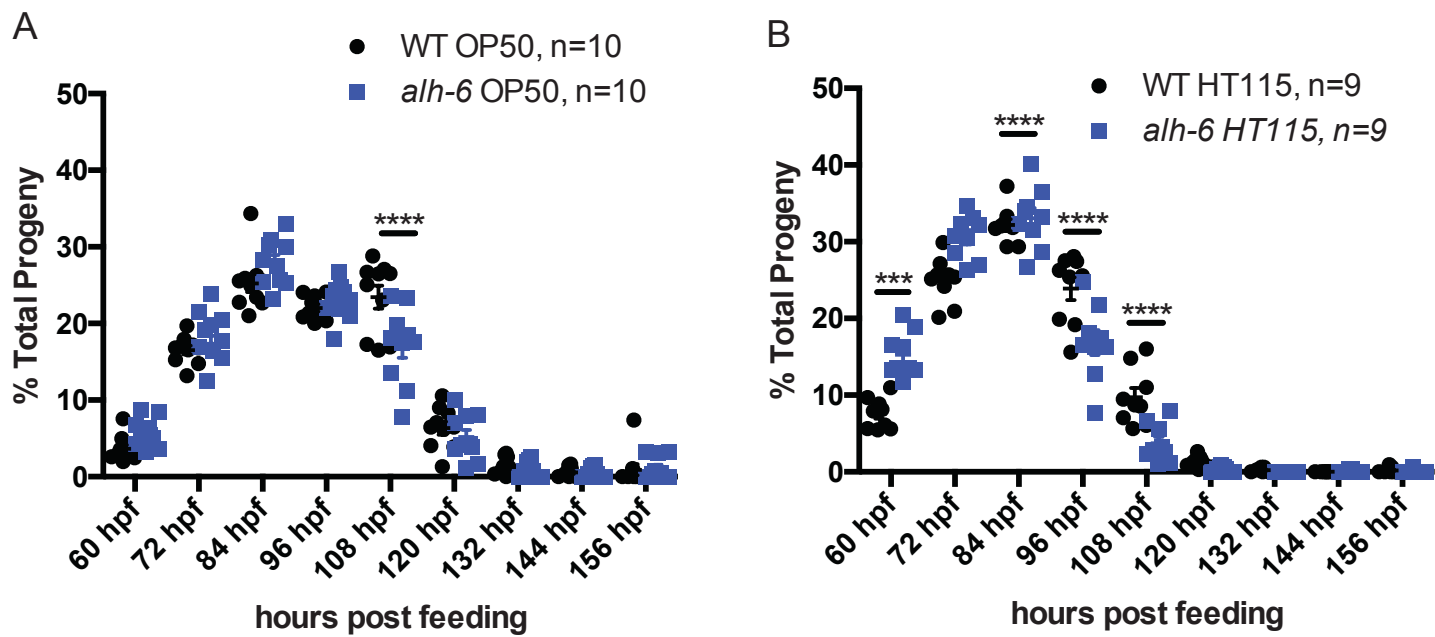

Supplemental Figure 3

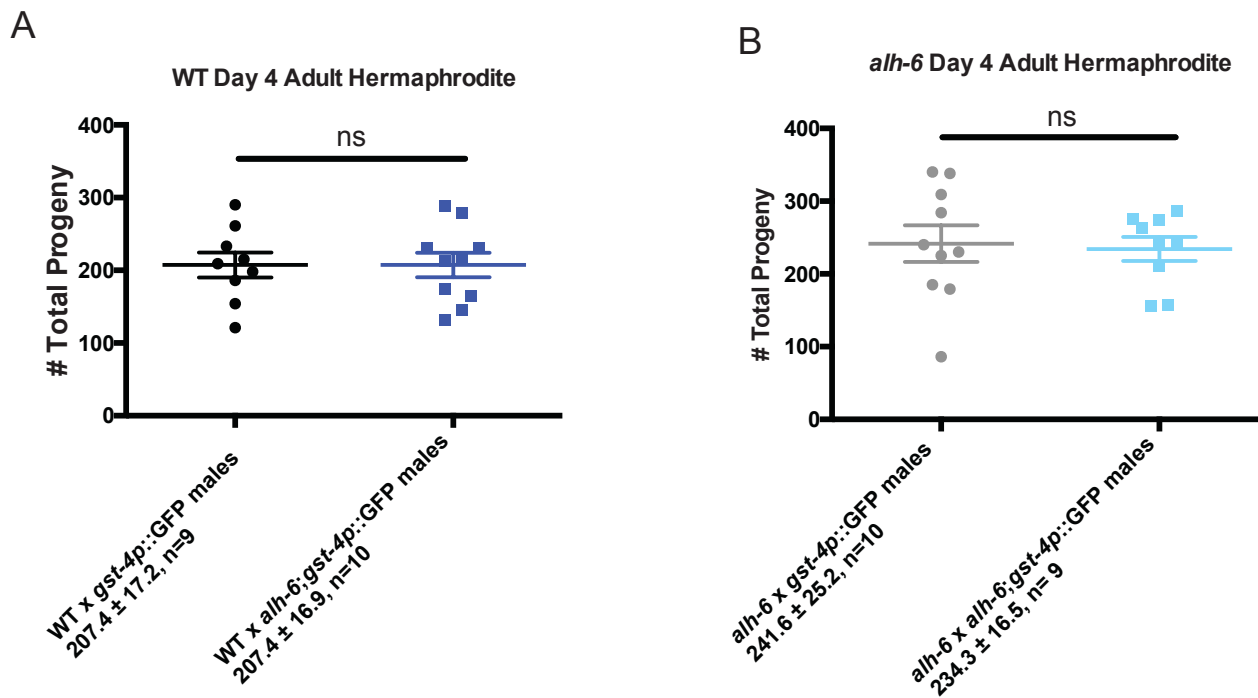

Supplemental Figure 4

A

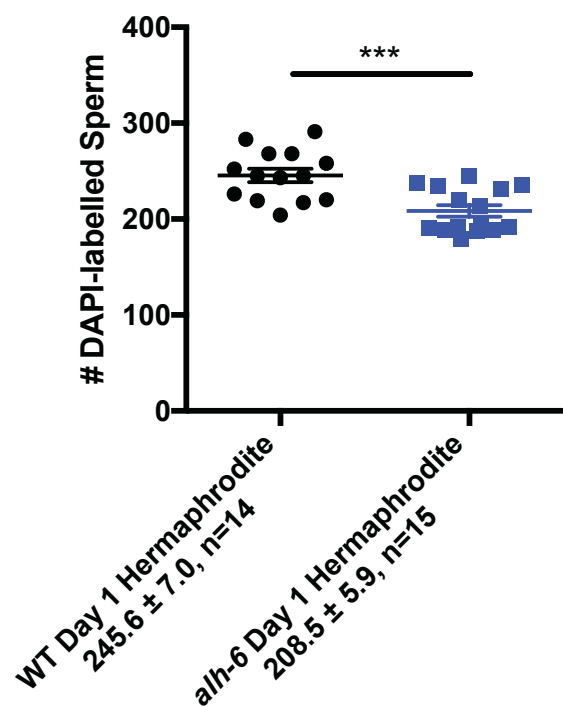

B

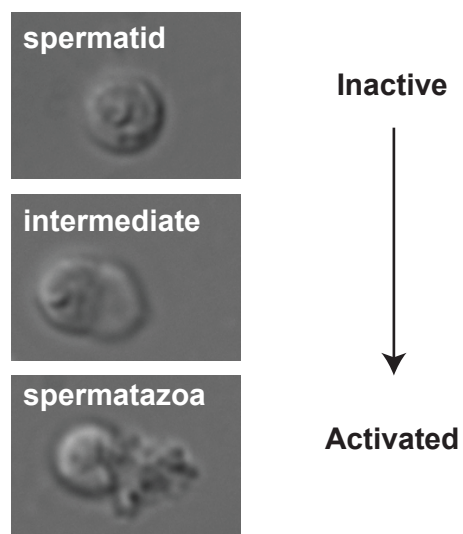

Supplemental Figure 5

A

*alh-6(lax105)* vs wild type  
2-fold increase in expression (0.05 FDR)

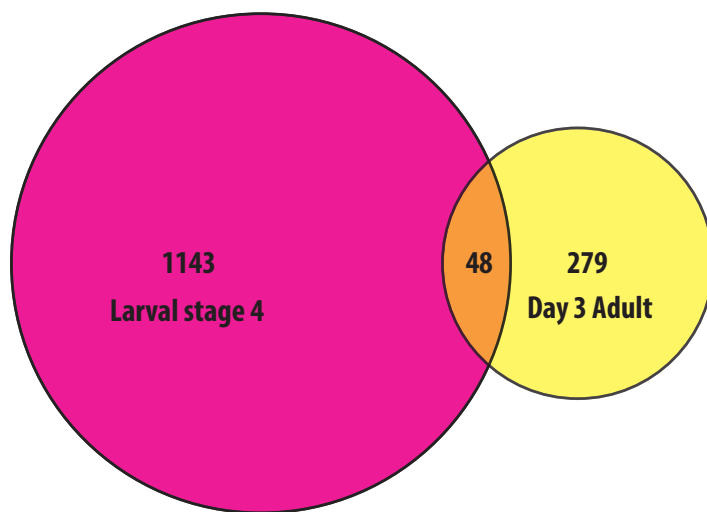

B

*alh-6(lax105)* vs wild type  
2-fold decrease in expression (0.05 FDR)

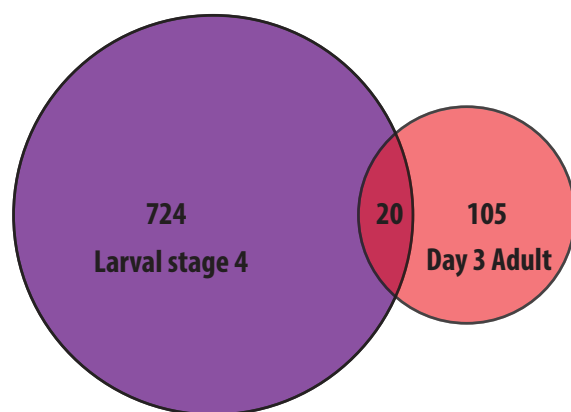

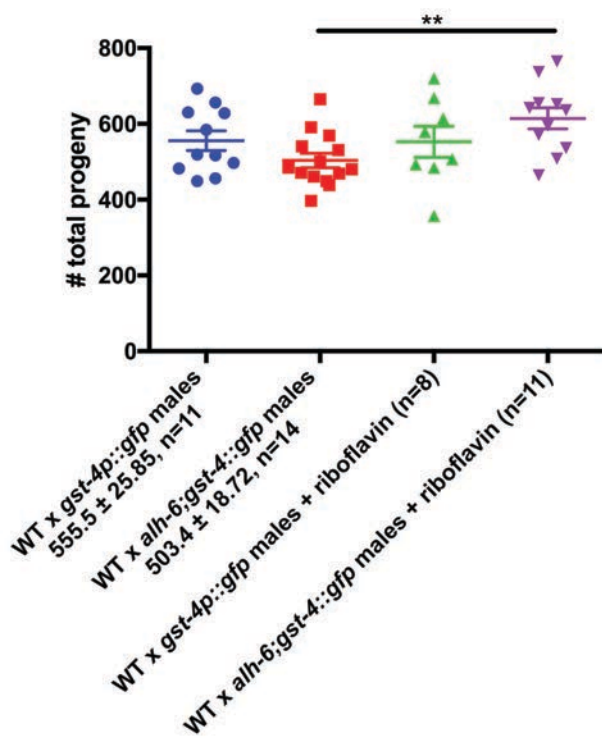

Supplemental Figure 7

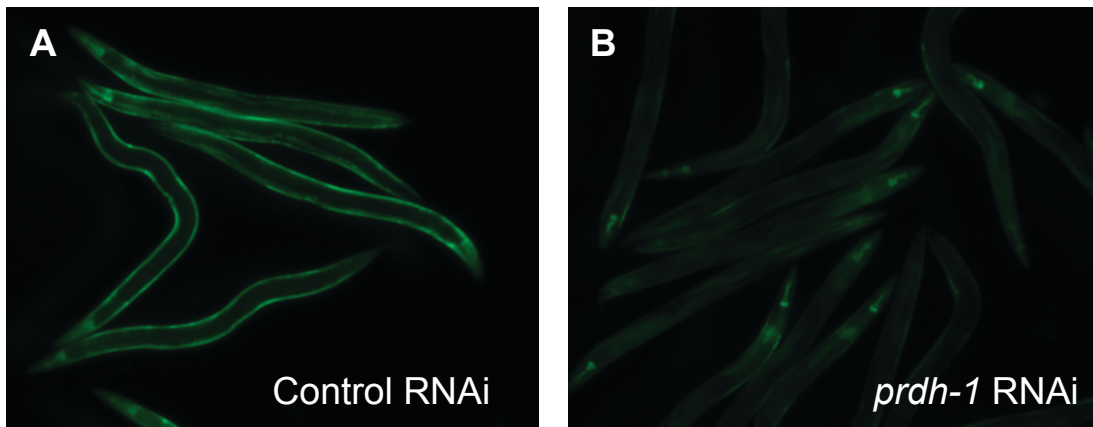

Supplemental Figure 8



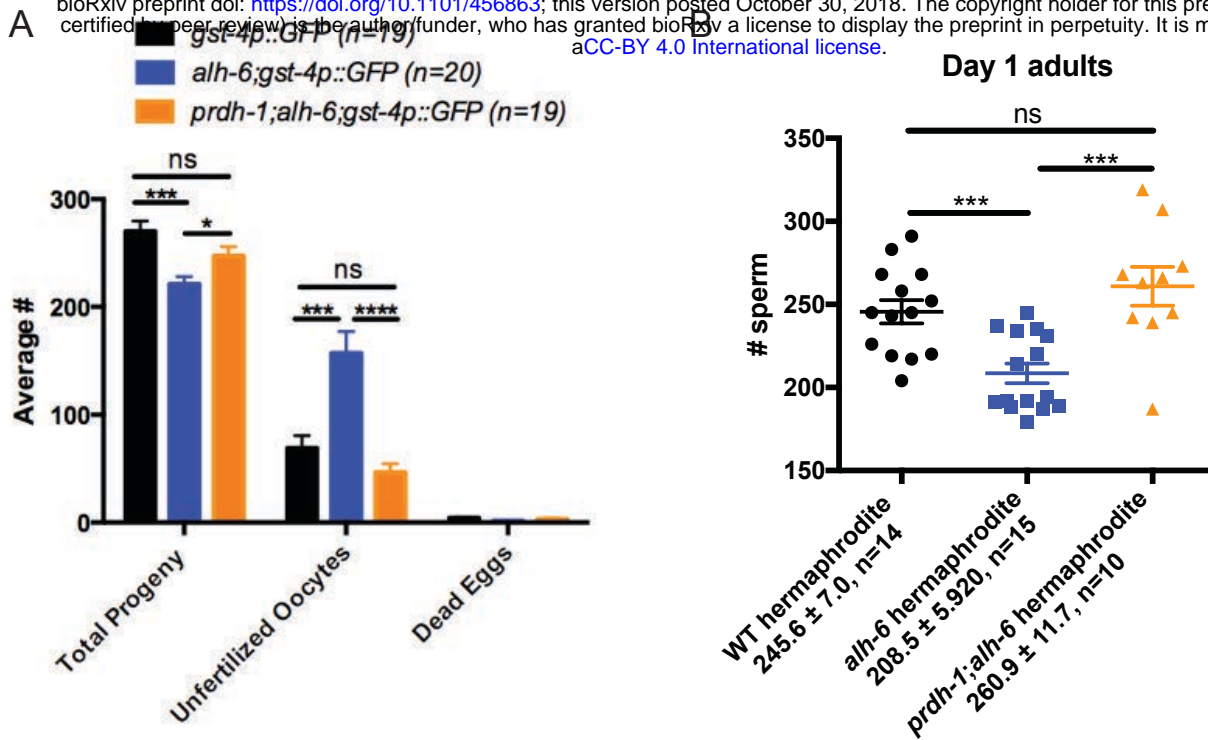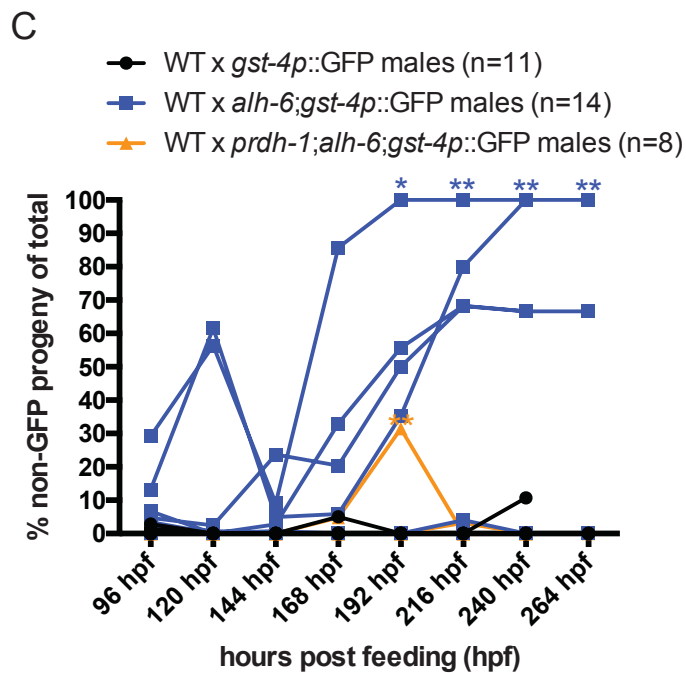

Supplemental Figure 9

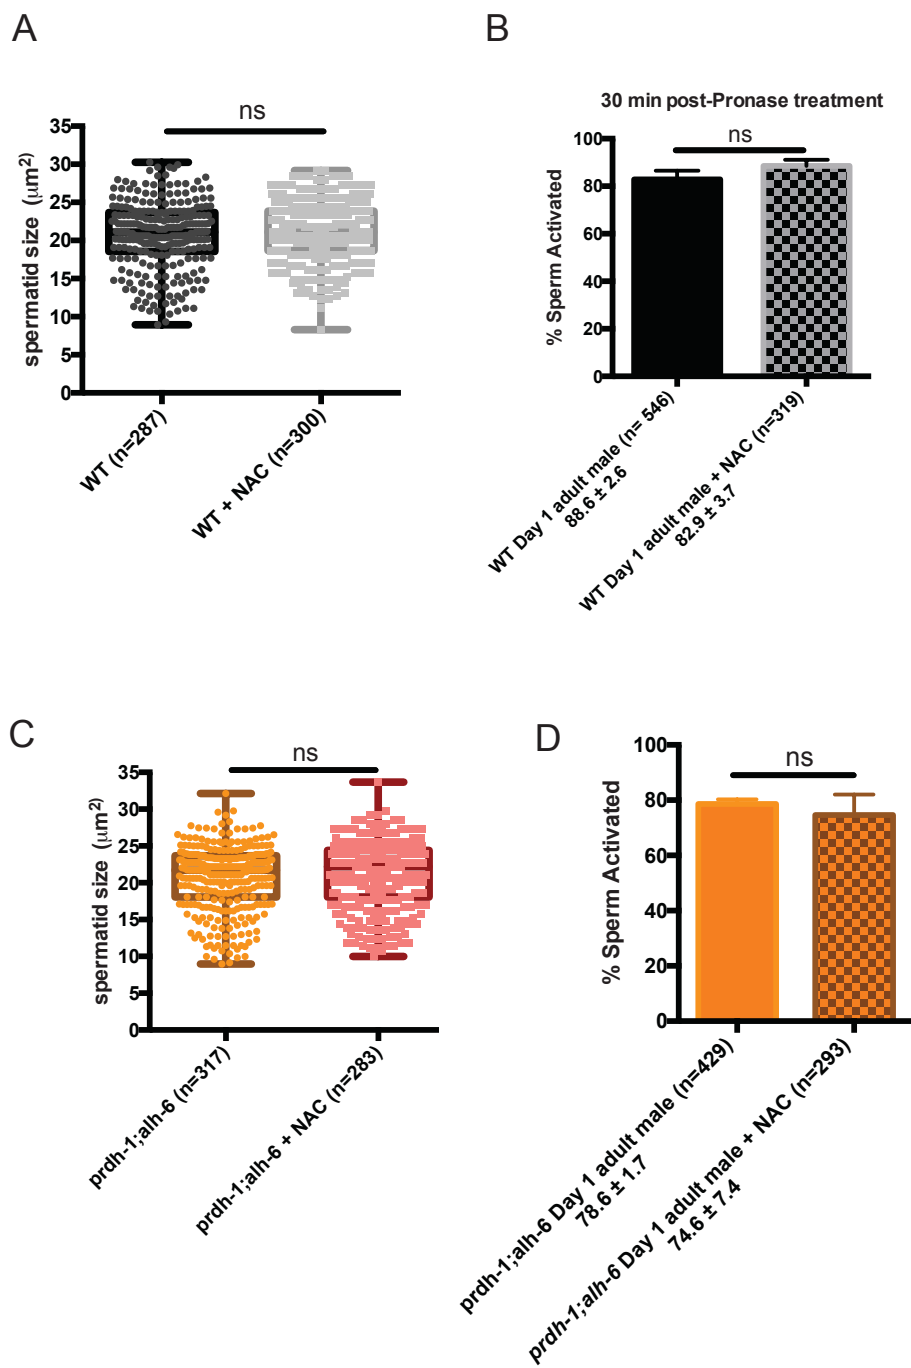

Supplemental Figure 10

|                      |                               |                                     |     |     |
|----------------------|-------------------------------|-------------------------------------|-----|-----|
| Fig 1A               | WT                            | <i>alh-6</i>                        | 17  | 18  |
| Fig 1B               | WT                            | <i>alh-6</i>                        | 9   | 9   |
| Fig 1C               | <i>gst-4p::gfp</i>            | <i>alh-6;gst-4p::gfp</i>            | 19  | 20  |
| Fig 1D               | WT x WT males                 | <i>alh-6</i> x WT males             | 12  | 12  |
| Fig 1E               | WT x <i>gst-4p::gfp</i> males | WT x <i>alh-6;gst-4p::gfp</i> males | 11  | 14  |
| Fig 2A               | WT                            | <i>alh-6</i>                        | 23  | 25  |
| Fig 2B               | WT                            | <i>alh-6</i>                        | 287 | 297 |
| Fig 2C               | WT                            | <i>alh-6</i>                        | 546 | 555 |
| Fig 3A               | WT - L4                       | <i>alh-6</i> - L4                   | 3   | 3   |
| 4000 worms each      |                               |                                     |     |     |
| Fig 4B               | WT - L4                       | <i>alh-6</i> - L4                   | 8   | 9   |
| 3000-5000 worms each |                               |                                     |     |     |
| Fig 4C               | WT                            | <i>alh-6</i>                        | 287 | 297 |
| Fig 4C               | WT                            | <i>alh-6</i>                        | 546 | 555 |
| Fig 5C               | WT - L4                       | <i>alh-6</i> - L4                   | 3   | 3   |
| 4000 worms each      |                               |                                     |     |     |
| Fig 5D               | WT                            | <i>alh-6</i>                        | 287 | 297 |
| Fig 5E               | WT                            | <i>alh-6</i>                        | 546 | 555 |
| Fig 6G               | WT                            | <i>alh-6</i>                        | 37  | 46  |
| Fig 6H               | WT                            | <i>alh-6</i>                        | 29  | 49  |
| Fig 6I               | WT                            | <i>alh-6</i>                        |     |     |

|                      |                                        |     |                                               |     |                                            |                                                  |
|----------------------|----------------------------------------|-----|-----------------------------------------------|-----|--------------------------------------------|--------------------------------------------------|
| Fig 6J               | WT L4440                               | 38  | <i>alh-6</i> L4440                            | 32  | WT <i>fzo-1</i> RNAi                       | <i>alh-6 fzo-1</i> RNAi                          |
| Fig 6K               | WT                                     | 103 | <i>alh-6</i>                                  | 119 | 92                                         | 102                                              |
| Fig 6L               | WT L4440                               | 156 | <i>alh-6</i> L4440                            | 134 | 157                                        | 140                                              |
| Fig 6M               | WT                                     | 303 | <i>alh-6</i>                                  | 336 | 337                                        | 328                                              |
| Fig S3A              | WT                                     | 419 | <i>alh-6</i>                                  | 476 | 439                                        | 432                                              |
| Fig S3B              | WT                                     | 10  | <i>alh-6</i>                                  | 10  |                                            |                                                  |
| Fig S4A              | WT x <i>gst-4p::gfp</i> males          | 9   | WT x <i>alh-6;gst-4p::gfp</i> males           | 9   |                                            |                                                  |
| Fig S4B              | <i>alh-6</i> x <i>gst-4p::gfp</i> male | 9   | <i>alh-6</i> x <i>alh-6;gst-4p::gfp</i> males | 10  |                                            |                                                  |
| Fig S5A              | WT                                     | 10  | <i>alh-6</i>                                  | 9   |                                            |                                                  |
| Fig S6               | WT - L4                                | 14  | <i>alh-6</i> - L4                             | 15  | WT - Day 3                                 | <i>alh-6</i> - Day 3                             |
| 4000 worms each      |                                        | 3   |                                               | 3   | 3                                          | 3                                                |
| Fig S7A              | WT - L4                                | 9   | <i>alh-6</i> - L4                             | 9   | WT - Day 3                                 | <i>alh-6</i> - Day 3                             |
| 3000-5000 worms each |                                        | 9   |                                               | 9   | 6                                          | 4                                                |
| Fig S7B              | WT x <i>gst-4p::gfp</i> males          | 11  | WT x <i>alh-6;gst-4p::gfp</i> males           | 14  | WT x <i>gst-4p::gfp</i> n                  | WT x <i>alh-6;gst-4p::gfp</i> males + riboflavin |
| Fig S8               | L4440                                  | 11  | <i>prdh-1</i> RNAi                            | 8   |                                            | 11                                               |
| 30-50                |                                        | 11  | 30-50                                         |     |                                            |                                                  |
| Fig S9A              | <i>gst-4p::gfp</i>                     | 19  | <i>alh-6;gst-4p::gfp</i>                      | 20  | <i>prdh-1;alh-6;gst-4p::gfp</i>            | 19                                               |
| Fig S9B              | WT                                     | 14  | <i>alh-6</i>                                  | 15  | <i>prdh-1;alh-6</i>                        | 10                                               |
| Fig S9C              | WT x <i>gst-4p::gfp</i> males          | 11  | WT x <i>alh-6;gst-4p::gfp</i> males           | 14  | WT x <i>prdh-1;alh-6;gst-4p::gfp</i> males | 8                                                |
| Fig S10A             | WT                                     | 287 | WT + NAC                                      | 300 |                                            |                                                  |

|                 |                            |                                  |     |
|-----------------|----------------------------|----------------------------------|-----|
| <b>Fig S10B</b> | <b>WT</b>                  | <b>WT + NAC</b>                  |     |
|                 |                            | 546                              | 319 |
| <b>Fig S10C</b> | <b><i>prdh-1;alh-6</i></b> | <b><i>prdh-1;alh-6</i> + NAC</b> |     |
|                 |                            | 317                              | 283 |
| <b>Fig S10D</b> | <b><i>prdh-1;alh-6</i></b> | <b><i>prdh-1;alh-6</i> + NAC</b> |     |
|                 |                            | 429                              | 293 |
